# Supplementary material
Source: PubMed Central journal article supplement (PMC7007701)
Supplement: NIHMS1549115-supplement-315686_Online.pdf [file NIHMS1549115-supplement-315686_Online.pdf]

## Supplemental Material

# Monogenic and Polygenic Contributions to Atrial Fibrillation Risk: Results from a National Biobank

Seung Hoan Choi<sup>1,†</sup>, Sean J. Jurgens<sup>1,†</sup>, Lu-Chen Weng<sup>1,2</sup>, James P. Pirruccello<sup>1</sup>, Carolina Roselli<sup>1</sup>, Mark Chaffin<sup>1</sup>, Christina Lee<sup>1</sup>, Amelia W. Hall<sup>1,2</sup>, Amit V. Khera<sup>1</sup>, Kathryn L. Lunetta<sup>3,4</sup>, Steven A. Lubitz<sup>1,2\*</sup> & Patrick T. Ellinor<sup>1,2\*</sup>

1. Cardiovascular Disease Initiative, The Broad Institute of MIT and Harvard, Cambridge, MA, USA
2. Cardiovascular Research Center, Massachusetts General Hospital, Boston, MA, USA
3. NHLBI and Boston University's Framingham Heart Study, Framingham, MA, USA
4. Department of Biostatistics, Boston University School of Public Health, Boston, MA, USA

† Contributed equally to this work.

\* Jointly supervised this work.

### **Tweet**

*TTN* is the gene most commonly implicated in atrial fibrillation. Loss-of-function variants in *TTN* are highly penetrant, but polygenic risk explains a larger proportion of genetic susceptibility to atrial fibrillation.

| Items                                                                                                                                                                   | Pages  |
|-------------------------------------------------------------------------------------------------------------------------------------------------------------------------|--------|
| <b>Detailed Methods</b>                                                                                                                                                 |        |
| Extended quality control in exome sequencing cohort                                                                                                                     | 3      |
| Variant quality control for genetic relatedness matrix                                                                                                                  | 3      |
| Sample quality control in PRS validation cohort                                                                                                                         | 3      |
| Extended procedure for PRS                                                                                                                                              | 3, 4   |
| <b>Supplemental Tables and supporting information</b>                                                                                                                   |        |
| Online Table I. Definitions for curated diseases and traits – please see the accompanying file                                                                          |        |
| Online Table II. Exclusion criteria for electrocardiogram traits                                                                                                        | 5      |
| Online Table III. Area under the receiver-operator-curve (AUC) values and P-values for AF PRS based on different values of $\rho$ using LDpred in the validation cohort | 6      |
| Online Table IV. Risk of atrial fibrillation conferred by increasingly extreme tails of the polygenic risk score compared to the remainder of the population            | 7      |
| Online Table V. Genome-wide significant and suggestive genes from exome-wide gene-based burden analysis                                                                 | 8      |
| Online Table VI. Loss of function burden analysis results for previously reported monogenic candidate genes for AF                                                      | 9      |
| Online Table VII. Loss of function burden analysis results for genes at AF GWAS loci                                                                                    | 10     |
| Online Table VIII. Frequency of LOF variants in genes implicated in monogenic forms of cardiovascular disease among the UK Biobank exomes                               | 11     |
| Online Table IX. <i>TTN</i> LOF variants among European ancestry in UK Biobank                                                                                          | 12     |
| Online Table X. <i>TTN</i> LOF association results with atrial fibrillation                                                                                             | 19     |
| Online Table XI. Sensitivity analyses for <i>TTN</i> LOF association with AF                                                                                            | 20     |
| Online Table XII. Association between RR interval and variants in <i>TTN</i>                                                                                            | 21     |
| Online Table XIII. Variability explained by models                                                                                                                      | 22     |
| Online Table XIV. Results from LOF burden analysis for aggregation of LOFs in functional categories                                                                     | 23     |
| <b>Supplemental Figures and Figure Legend</b>                                                                                                                           |        |
| Online Figure I. Flowchart for AF polygenetic risk score validation and application in UK Biobank                                                                       | 24     |
| Online Figure II. Quantile-quantile plot for gene-based burden analysis for loss-of-function variants                                                                   | 25     |
| Online Figure III. Manhattan plot of the association between previously reported monogenic genes and atrial fibrillation.                                               | 26     |
| Online Figure IV. Forest plot for associated diseases and LOF variants in <i>TTN</i> .                                                                                  | 27     |
| Online Figure V. Sensitivity analyses between associated diseases and LOF variants in <i>TTN</i>                                                                        | 28     |
| Online Figure VI. Risk of atrial fibrillation conferred by loss-of-function variants in cardiac <i>TTN</i> compared to polygenic risk in the UK Biobank                 | 29     |
| <b>Supplemental References</b>                                                                                                                                          | 30, 31 |

## Detailed Methods

### Extended quality control in exome sequencing cohort

#### *Whole exome sequencing variant calling*

A 'Functionally Equivalent' dataset was created according to the primary analysis protocol<sup>1</sup> and was subject to GATK 3.0 variant calling. Variants with inbreeding coefficient  $< -0.03$  or without at least one variant genotype of read depth  $\geq 10$ , genotype quality  $\geq 20$  and, if heterozygous, allelic balance  $\geq 0.20$  were filtered out (<https://biobank.ctsu.ox.ac.uk/showcase/label.cgi?id=170>). Variants were annotated to genome build GRCh38.

#### *Sample quality control*

In addition to sample quality control performed based on exome sequencing data, extended sample quality control was performed based on genotyping array data. Details on genotyping procedures and how quality metrics were derived are described in detail elsewhere<sup>2</sup>. In brief, genotyping was performed using Affymetrix UK biobank Axiom (450,000 samples) and Affymetrix UK BiLEVE axiom (50,000 samples) arrays<sup>2</sup>. Subsequently, the genetic data were imputed to the Haplotype Reference Consortium panel<sup>3</sup> and UK10K<sup>4</sup> + 1000 Genomes<sup>5</sup> panel. In the present analysis, samples that were outliers for heterozygosity or missingness were removed. In addition, individuals with putative sex chromosome aneuploidy or with a mismatch between self-reported and genetically inferred sex were excluded. Samples were further excluded if they were not used in the central kinship inference. We additionally restricted our analysis to individuals who were of white-European descent, as determined by Principal Component Analysis described previously<sup>6</sup>. Individuals who decided to revoke their consent were also excluded from the cohort, leaving 43,139 subjects. An unrelated subset of 41,335 individuals was also defined where no first, second or third degree relationships were present, as determined by KING coefficients of  $< 0.0442$ <sup>2, 7</sup>. To identify the maximum number of unrelated individuals, we first calculated which individuals had excess relatives (2 or more) and iteratively removed these individuals until none remained. Then, for each pair of remaining related individuals, a single sample was removed at random.

### Variant quality control for genetic relatedness matrix

A subset of high-quality variants from the genotyping array was used to estimate the genetic relatedness matrix used in SAIGE. Variants with MAF  $< 1\%$ , missingness  $> 1\%$  or that failed a stringent Hardy-Weinberg equilibrium test ( $p < 0.001$ ) were removed. Variants present in the MHC or the chromosome 8 inversion regions of the genome were additionally excluded. Finally, two rounds of linkage-disequilibrium-based pruning were performed (*--indep-pairwise 200 100 0.1* and *--indep-pairwise 200 100 0.05* in PLINK2.0<sup>8</sup>). After quality control, 93,491 high-quality independent variants remained.

### Sample quality control in PRS validation cohort

The best performing AF PRS was identified in a validation cohort independent of the exome sequencing cohort. This group was formed using all individuals with genotyping array data for whom exome sequencing data was not available. Individuals were removed if they were related to any samples in the exome sequencing cohort by 3rd degree or closer (KING coefficient  $< 0.0442$ ) or if they were related to any other samples within the validation cohort. The remaining quality control steps were identical to those described in the extended sample quality control for the exome sequencing cohort, leaving 322,161 unrelated individuals of white-European descent with high-quality genotyping array data.

### Extended procedure for PRS

#### *LDpred algorithm*

Derivation of multiple candidate PRSs for AF has been described in detail in a previous manuscript<sup>9</sup>. In short, LDpred employs a Bayesian approach that calculates posterior mean effect sizes for each variant, based on a

prior from GWAS summary statistics<sup>10</sup>. A subsequent shrinkage is applied based on the degree of linkage disequilibrium with other variants (the extent to which a given variant is correlated with other nearby variants in a reference population). A reference of European genome sequences from the 1000 Genomes panel (N=503) was used. The algorithm additionally takes into account a parameter  $\rho$ , which represent the assumed fraction of variants in the genome with nonzero effect sizes. A range of  $\rho$  values were used in the validation cohort: 1.0, 0.3, 0.1, 0.03, 0.01, 0.003, and 0.001. The PRS based on the value of  $\rho$  with the best predictive performance in the validation cohort was chosen and subsequently applied to the exome-sequencing cohort.

### *Individual scoring*

Variant phasing and version 3 imputation in the UK Biobank have been described in detail previously<sup>2</sup>. Individuals were scored using genetic dosages of imputed variants in PLINK2.0<sup>8</sup>, using function `--score cols=scoresums`. During this process, we restricted ourselves to variants with high imputation quality (INFO>0.3). Almost all LDpred-adjusted variants were present in the UK Biobank at high quality, as shown in a previous manuscript<sup>11</sup>.

## Online Table II. Exclusion criteria for electrocardiogram traits

| ECG traits        | RR interval          | PR interval         | QRS complex        | Corrected QT interval                        | P wave duration |
|-------------------|----------------------|---------------------|--------------------|----------------------------------------------|-----------------|
| <b>Exclusions</b> | <600ms or<br>>1500ms | <80ms or<br>>320 ms | <60ms<br>or >150ms | QRS complex >120ms,<br>HR <40, or<br>HR >120 | <40ms or >180ms |

Note, QT was corrected using Bazett's formula; HR: heart rate; ms: milliseconds

**Online Table III. Area under the receiver-operator-curve (AUC) values and P-values for AF PRS based on different values of  $\rho$  using LDpred in the validation cohort**

| $\rho$                 | With covariates (age, sex, PC1-4) |                           |                              | No covariates       |                           |                              |
|------------------------|-----------------------------------|---------------------------|------------------------------|---------------------|---------------------------|------------------------------|
|                        | AUC                               | 95%CI                     | P-value                      | AUC                 | 95%CI                     | P-value                      |
| 1                      | 0.748                             | 0.744-0.752               | 5.03E-167                    | 0.57                | 0.565-0.575               | 1.97E-162                    |
| <b>3.00E-01</b>        | 0.749                             | 0.744-0.753               | 7.40E-181                    | 0.573               | 0.568-0.578               | 9.59E-176                    |
| <b>1.00E-01</b>        | 0.75                              | 0.746-0.754               | 7.15E-216                    | 0.579               | 0.574-0.584               | 1.83E-209                    |
| <b>3.00E-02</b>        | 0.753                             | 0.749-0.757               | 3.42E-276                    | 0.588               | 0.583-0.593               | 1.25E-267                    |
| <b>1.00E-02</b>        | 0.757                             | 0.753-0.761               | < 2.00E-280                  | 0.6                 | 0.594-0.605               | < 2.00E-280                  |
| <b><u>3.00E-03</u></b> | <b><u>0.762</u></b>               | <b><u>0.758-0.766</u></b> | <b><u>&lt; 2.00E-280</u></b> | <b><u>0.613</u></b> | <b><u>0.608-0.618</u></b> | <b><u>&lt; 2.00E-280</u></b> |
| <b>1.00E-03</b>        | 0.739                             | 0.735-0.744               | 0.000803                     | 0.509               | 0.504-0.514               | 0.000415                     |

**Abbreviations:** AUC: area under the receiver operating characteristic curve, CI: confidence interval, PC: principle component of ancestry

**Online Table IV. Risk of atrial fibrillation conferred by increasingly extreme tails of the polygenic risk score compared to the remainder of the population**

| Before removing cases of HF before AF |                |                                      |                                           |                                   |          |
|---------------------------------------|----------------|--------------------------------------|-------------------------------------------|-----------------------------------|----------|
| Tail of PRS                           | Sample size, N | No. AF cases in tail, N/ N total (%) | No. AF cases in remainder, N/ N total (%) | OR compared to remainder [95% CI] | P-value  |
| Top 33.3%                             | 41335          | 758/13778 (5.5)                      | 758/26080 (2.9)                           | 2.2 [1.98-2.44]                   | <10E-15  |
| Top 10%                               | 41335          | 305/4135 (7.4)                       | 1172/35723 (3.3)                          | 2.53 [2.21-2.89]                  | <10E-15  |
| Top 2.5%                              | 41335          | 102/1033 (9.9)                       | 1375/38825 (3.5)                          | 3.21 [2.57-3.97]                  | <10E-15  |
| Top 1%                                | 41335          | 38/413 (9.2)                         | 1439/39445 (3.6)                          | 2.83 [1.97-3.95]                  | 1.69E-07 |
| Top 0.45%                             | 41335          | 17/188 (9.0)                         | 1460/39670 (3.7)                          | 2.76 [1.60-4.47]                  | 5.45E-04 |
| Top 0.15%                             | 41335          | 8/62 (12.9)                          | 1469/39796 (3.7)                          | 5.81 [2.53-11.89]                 | 1.60E-04 |
| Top 0.1%                              | 41335          | 6/41 (14.6)                          | 1471/39817 (3.7)                          | 7.3 [2.76-16.63]                  | 2.91E-04 |
| After removing cases of HF before AF  |                |                                      |                                           |                                   |          |
| Tail of PRS                           | Sample size, N | No. AF cases in tail, N/ N total (%) | No. AF cases in remainder, N/ N total (%) | OR compared to remainder [95% CI] | P-value  |
| Top 33.3%                             | 41212          | 699/13737 (5.1)                      | 655/26121 (2.5)                           | 2.2 [1.99-2.48]                   | <10E-15  |
| Top 10%                               | 41212          | 284/4121 (6.9)                       | 1070/35737 (3.0)                          | 2.57 [2.24-2.95]                  | <10E-15  |
| Top 2.5%                              | 41212          | 95/1030 (9.2)                        | 1259/38828 (3.2)                          | 3.26 [2.59-4.06]                  | <10E-15  |
| Top 1%                                | 41212          | 36/412 (8.7)                         | 1318/39446 (3.3)                          | 2.93 [2.02-4.11]                  | 1.48E-07 |
| Top 0.44%                             | 41212          | 17/181 (9.4)                         | 1337/39677 (3.4)                          | 3.24 [1.88-5.25]                  | 8.48E-05 |
| Top 0.2%                              | 41212          | 10/82 (12.2)                         | 1344/39776 (3.4)                          | 5.3 [2.54-10.03]                  | 5.43E-05 |
| Top 0.1%                              | 41212          | 6/41 (14.6)                          | 1348/39817 (3.4)                          | 7.86 [2.97-17.88]                 | 1.88E-04 |

**Abbreviations:** AF: atrial fibrillation, OR: odds ratio, CI: confidence interval, PRS: polygenic risk score, HF: heart failure

**Online Table V. Genome-wide significant gene from exome-wide gene-based burden analysis**

|            |                |                 |                                         |                                         | Unadjusted for PRS |           |          | Adjusted for PRS |           |          |
|------------|----------------|-----------------|-----------------------------------------|-----------------------------------------|--------------------|-----------|----------|------------------|-----------|----------|
| Gene       | Sample size, N | LOF carriers, N | LOF carriers in AF cases, N/Total N (%) | LOF carriers in controls, N/Total N (%) | OR                 | 95% CI    | P-value  | OR               | 95% CI    | P-value  |
| <i>TTN</i> | 43139          | 554             | 49/1546 (3.17)                          | 505/41593 (1.21)                        | 2.71               | 1.97-3.66 | 2.50E-08 | 2.70             | 1.95-3.66 | 3.12E-08 |

**Abbreviations:** LOF: high confidence loss of function variants, AF: atrial fibrillation, OR: odds ratio, CI: confidence interval, PRS: polygenic risk score, SE: standard error



**Online Table VI. Loss of function burden analysis results for previously reported monogenic candidate genes for AF**

| Gene                                                                                                                                                                                                                                                                                      | Sample size, N | LOF carriers, N | LOF carriers in AF cases, N/Total N (%) | LOF carriers in controls, N/Total N (%) | OR   | 95% CI       | P-value | Ref    |
|-------------------------------------------------------------------------------------------------------------------------------------------------------------------------------------------------------------------------------------------------------------------------------------------|----------------|-----------------|-----------------------------------------|-----------------------------------------|------|--------------|---------|--------|
| <i>SYNE2</i>                                                                                                                                                                                                                                                                              | 43139          | 154             | 1/1546(0.06)                            | 153/41593(0.37)                         | 0.26 | [0.03-0.94]  | 0.04    | 12     |
| <i>RYR2</i>                                                                                                                                                                                                                                                                               | 43139          | 832             | 21/1546(1.36)                           | 811/41593(1.95)                         | 0.60 | [0.36-0.94]  | 0.09    | 13     |
| <i>SCN10A</i>                                                                                                                                                                                                                                                                             | 43139          | 92              | 5/1546(0.32)                            | 87/41593(0.21)                          | 1.76 | [0.57-4.16]  | 0.16    | 14, 15 |
| <i>KCNE5</i>                                                                                                                                                                                                                                                                              | 43139          | 45              | 0/1546(0)                               | 45/41593(0.11)                          | 0.29 | [0-2.07]     | 0.19    | 16     |
| <i>ZFH3</i>                                                                                                                                                                                                                                                                               | 43139          | 21              | 0/1546(0)                               | 21/41593(0.05)                          | 0.58 | [0-4.39]     | 0.36    | 12     |
| <i>HCN4</i>                                                                                                                                                                                                                                                                               | 43139          | 16              | 0/1546(0)                               | 16/41593(0.04)                          | 0.65 | [0-5.17]     | 0.38    | 17     |
| <i>JPH2</i>                                                                                                                                                                                                                                                                               | 43139          | 13              | 1/1546(0.06)                            | 12/41593(0.03)                          | 3.43 | [0.35-16.11] | 0.40    | 18     |
| <i>KCNE2</i>                                                                                                                                                                                                                                                                              | 43139          | 12              | 0/1546(0)                               | 12/41593(0.03)                          | 0.79 | [0.01-6.55]  | 0.41    | 19-21  |
| <i>KCNQ1</i>                                                                                                                                                                                                                                                                              | 43139          | 20              | 0/1546(0)                               | 20/41593(0.05)                          | 0.87 | [0.01-6.55]  | 0.43    | 22-24  |
| <i>NUP155</i>                                                                                                                                                                                                                                                                             | 43139          | 14              | 0/1546(0)                               | 14/41593(0.03)                          | 0.83 | [0.01-6.59]  | 0.45    | 25     |
| <i>KCNA5</i>                                                                                                                                                                                                                                                                              | 43139          | 10              | 0/1546(0)                               | 10/41593(0.02)                          | 1.20 | [0.01-10.17] | 0.52    | 26, 27 |
| <i>SCN5A</i>                                                                                                                                                                                                                                                                              | 43139          | 28              | 1/1546(0.06)                            | 27/41593(0.06)                          | 1.88 | [0.21-7.5]   | 0.89    | 28-30  |
| <i>KCNN3</i>                                                                                                                                                                                                                                                                              | 43139          | 151             | 5/1546(0.32)                            | 146/41593(0.35)                         | 0.89 | [0.29-2.05]  | 0.90    | 12     |
| <p><b>Genes not testable for an association with AF due to an insufficient number of LOF carrier:</b> <i>SCN1B, SCN2B, SCN3B, SCN4B, ABCC9, KCND3, KCNE1, KCNE3, KCNE4, KCNH2, KCNJ2, KCNJ5, KCNJ8, GATA4, GATA5, GATA6, GJA1, GJA5, GREM2, LMNA, NKX2-5, NKX2-6, NPPA, and PITX2</i></p> |                |                 |                                         |                                         |      |              |         |        |

**Abbreviations:** LOF: high confidence loss of function variants, AF: atrial fibrillation, OR: odds ratio, CI: confidence interval, PRS: polygenic risk score, SE: standard error, Ref: reference.

**Online Table VII. Loss of function burden analysis results for genes at AF GWAS loci**

| Gene           | Sample size, N | LOF carriers, N | LOF carriers in AF cases, N/Total N (%) | LOF carriers in controls, N/Total N (%) | OR   | 95% CI     | P-value  |
|----------------|----------------|-----------------|-----------------------------------------|-----------------------------------------|------|------------|----------|
| <i>TTN</i>     | 43139          | 554             | 49/1546(3.17)                           | 505/41593(1.21)                         | 2.71 | 1.97-3.66  | 2.50E-08 |
| <i>PKP2</i>    | 43139          | 48              | 7/1546(0.45)                            | 41/41593(0.1)                           | 4.64 | 1.92-9.84  | 1.18E-03 |
| <i>DDX20</i>   | 43139          | 99              | 10/1546(0.65)                           | 89/41593(0.21)                          | 3.24 | 1.57-6.04  | 1.98E-03 |
| <i>TMEM102</i> | 43139          | 826             | 15/1546(0.97)                           | 811/41593(1.95)                         | 0.44 | 0.25-0.73  | 3.73E-03 |
| <i>DENND3</i>  | 43139          | 34              | 4/1546(0.26)                            | 30/41593(0.07)                          | 5.3  | 1.65-13.5  | 6.80E-03 |
| <i>KLHL38</i>  | 43139          | 41              | 5/1546(0.32)                            | 36/41593(0.09)                          | 4.38 | 1.53-10.48 | 7.32E-03 |
| <i>TNK1</i>    | 43139          | 64              | 6/1546(0.39)                            | 58/41593(0.14)                          | 3.27 | 1.27-7.13  | 1.35E-02 |
| <i>ADAM15</i>  | 43139          | 34              | 4/1546(0.26)                            | 30/41593(0.07)                          | 4.3  | 1.33-11.11 | 1.45E-02 |
| <i>ATAD2</i>   | 43139          | 2026            | 54/1546(3.49)                           | 1972/41593(4.74)                        | 0.72 | 0.53-0.94  | 1.83E-02 |
| <i>BID</i>     | 43139          | 13              | 2/1546(0.13)                            | 11/41593(0.03)                          | 7.28 | 1.35-27    | 2.36E-02 |
| <i>ETV1</i>    | 43139          | 11              | 2/1546(0.13)                            | 9/41593(0.02)                           | 7.27 | 1.26-29.86 | 2.60E-02 |
| <i>KCNJ1</i>   | 43139          | 35              | 4/1546(0.26)                            | 31/41593(0.07)                          | 3.51 | 1.09-9.03  | 2.81E-02 |
| <i>HAUS4</i>   | 43139          | 12              | 2/1546(0.13)                            | 10/41593(0.02)                          | 6.6  | 1.2-24.9   | 2.94E-02 |
| <i>USP18</i>   | 43139          | 12              | 2/1546(0.13)                            | 10/41593(0.02)                          | 3.63 | 0.38-16.77 | 3.05E-02 |
| <i>PBXIP1</i>  | 43139          | 58              | 5/1546(0.32)                            | 53/41593(0.13)                          | 2.89 | 1.04-6.56  | 3.16E-02 |
| <i>GFER</i>    | 43139          | 54              | 5/1546(0.32)                            | 49/41593(0.12)                          | 2.94 | 1.05-6.78  | 3.20E-02 |
| <i>GIMAP8</i>  | 43139          | 27              | 3/1546(0.19)                            | 24/41593(0.06)                          | 4.18 | 1.08-12.05 | 3.20E-02 |
| <i>POLR3D</i>  | 43139          | 47              | 4/1546(0.26)                            | 43/41593(0.1)                           | 2.58 | 0.69-7.05  | 3.24E-02 |
| <i>KRTCAP2</i> | 43139          | 21              | 3/1546(0.19)                            | 18/41593(0.04)                          | 3.02 | 0.58-10.42 | 3.77E-02 |
| <i>SYNE2</i>   | 43139          | 154             | 1/1546(0.06)                            | 153/41593(0.37)                         | 0.26 | 0.03-0.94  | 3.79E-02 |
| <i>ABCA3</i>   | 43139          | 14              | 2/1546(0.13)                            | 12/41593(0.03)                          | 6.15 | 1.09-24.52 | 4.14E-02 |
| <i>TLE3</i>    | 43139          | 84              | 5/1546(0.32)                            | 79/41593(0.19)                          | 1.86 | 0.51-4.82  | 4.92E-02 |

Note, among the 1181 potential genes/reading frames within +/- 500kb from the top 94 GWAS loci, 760 genes were not tested due to insufficient number of LOF carriers or because they were not protein-coding. GWAS: genome wide association studies, LOF: high confidence loss of function variants, AF: atrial fibrillation, OR: odds ratio, CI: confidence interval, PRS: polygenic risk score, SE: standard error

**Online Table VIII. Frequency of LOF variants in genes implicated in monogenic forms of cardiovascular disease among the UK Biobank exomes**

| <b>Gene</b>                   | <b>LOF carriers, N (%)</b> | <b>Relative frequency compared to LOF in canonical <i>TTN</i></b> | <b>Relative frequency compared to LOF in cardiac <i>TTN</i></b> |
|-------------------------------|----------------------------|-------------------------------------------------------------------|-----------------------------------------------------------------|
| <b><i>TTN</i> (canonical)</b> | 554 (1.3)                  | 1                                                                 | 2.8                                                             |
| <b><i>TTN</i> (cardiac)</b>   | 198 (0.44)                 | 0.36                                                              | 1                                                               |
| <b><i>SCN5A</i></b>           | 28 (0.065)                 | 0.051                                                             | 0.14                                                            |
| <b><i>KCNQ1</i></b>           | 20 (0.046)                 | 0.036                                                             | 0.10                                                            |
| <b><i>MYBPC3</i></b>          | 19 (0.044)                 | 0.034                                                             | 0.096                                                           |
| <b><i>LDLR</i></b>            | 12 (0.028)                 | 0.022                                                             | 0.061                                                           |

**Abbreviations:** LOF: high-confidence loss-of-function

**Online Table IX. *TTN* LOF variants among European ancestry in UK Biobank**

| Locus          | Ref                                     | Alt    | Consequence     | hgvs_c              | hgvs_p               | Control | AF | CMP | HF |
|----------------|-----------------------------------------|--------|-----------------|---------------------|----------------------|---------|----|-----|----|
| chr2:178528273 | C                                       | T      | splice donor    | c.107377+1G>A       |                      | 2       | 0  | 0   | 0  |
| chr2:178528307 | G                                       | A      | stop gained     | c.107344C>T         | p.Gln35782Ter        | 1       | 0  | 0   | 0  |
| chr2:178528797 | G                                       | A      | stop gained     | c.106954C>T         | p.Arg35652Ter        | 1       | 0  | 0   | 0  |
| chr2:178529121 | CT                                      | C      | frameshift      | c.106629del         | p.Ala35544ProfsTer2  | 1       | 0  | 0   | 0  |
| chr2:178529958 | A                                       | T      | splice donor    | c.106531+2T>A       |                      | 1       | 0  | 0   | 0  |
| chr2:178530467 | TG                                      | T      | frameshift      | c.106147del         | p.His35383MetfsTer22 | 1       | 0  | 0   | 0  |
| chr2:178530809 | GT                                      | G      | frameshift      | c.105805del         | p.Thr35269GlnfsTer24 | 1       | 0  | 0   | 0  |
| chr2:178531423 | AAC                                     | A      | frameshift      | c.105190_105191del  | p.Val35064PhefsTer4  | 1       | 0  | 0   | 0  |
| chr2:178531668 | G                                       | A      | stop gained     | c.104947C>T         | p.Gln34983Ter        | 2       | 0  | 0   | 0  |
| chr2:178531788 | G                                       | A      | stop gained     | c.104827C>T         | p.Arg34943Ter        | 2       | 0  | 0   | 0  |
| chr2:178531887 | TG                                      | T      | frameshift      | c.104727del         | p.Arg34910GlyfsTer5  | 7       | 1  | 0   | 0  |
| chr2:178531890 | AAAAGATA<br>TCAAATCT<br>TGCAGACC<br>TCT | A      | frameshift      | c.104699_104724del  | p.Glu34900ValfsTer4  | 7       | 1  | 0   | 0  |
| chr2:178531925 | GA                                      | G      | frameshift      | c.104689del         | p.Ser34897ArgfsTer18 | 0       | 1  | 0   | 0  |
| chr2:178532844 | G                                       | A      | stop gained     | c.103771C>T         | p.Arg34591Ter        | 0       | 1  | 1   | 1  |
| chr2:178532971 | A                                       | C      | stop gained     | c.103644T>G         | p.Tyr34548Ter        | 0       | 1  | 0   | 0  |
| chr2:178533652 | G                                       | GTTGA  | frameshift      | c.102959_102962dup  | p.Ser34322GlnfsTer7  | 1       | 0  | 0   | 0  |
| chr2:178534089 | G                                       | A      | stop gained     | c.102526C>T         | p.Gln34176Ter        | 1       | 0  | 0   | 0  |
| chr2:178534344 | G                                       | GGT    | frameshift      | c.102269_102270dup  | p.Arg34091ThrfsTer8  | 2       | 0  | 0   | 0  |
| chr2:178534619 | C                                       | T      | stop gained     | c.101996G>A         | p.Trp33999Ter        | 0       | 1  | 0   | 0  |
| chr2:178535516 | T                                       | TA     | frameshift      | c.101098_101099insT | p.Asp33700ValfsTer13 | 1       | 0  | 0   | 0  |
| chr2:178536180 | GA                                      | G      | frameshift      | c.100566del         | p.Pro33523GlnfsTer19 | 1       | 0  | 0   | 0  |
| chr2:178536937 | C                                       | T      | splice donor    | c.100171+1G>A       |                      | 1       | 0  | 0   | 0  |
| chr2:178539764 | CCT                                     | C      | frameshift      | c.98299_98300del    | p.Arg32767GlyfsTer2  | 1       | 0  | 0   | 0  |
| chr2:178540303 | C                                       | T      | stop gained     | c.97863G>A          | p.Trp32621Ter        | 1       | 0  | 0   | 0  |
| chr2:178542492 | C                                       | A      | stop gained     | c.97264G>T          | p.Glu32422Ter        | 0       | 1  | 1   | 1  |
| chr2:178543508 | T                                       | TA     | frameshift      | c.96464dup          | p.Thr32156AsnfsTer37 | 1       | 0  | 0   | 0  |
| chr2:178544116 | C                                       | T      | splice acceptor | c.96029-1G>A        |                      | 1       | 0  | 0   | 0  |
| chr2:178544241 | G                                       | C      | stop gained     | c.95988C>G          | p.Tyr31996Ter        | 0       | 1  | 0   | 1  |
| chr2:178545817 | TACTG                                   | T      | splice donor    | c.95415_95416+2del  |                      | 2       | 0  | 0   | 0  |
| chr2:178547518 | CTTTAA                                  | C      | frameshift      | c.94103_94107del    | p.Ile31368SerfsTer34 | 1       | 0  | 0   | 0  |
| chr2:178547890 | TG                                      | T      | frameshift      | c.93735del          | p.Val31247Ter        | 0       | 1  | 0   | 0  |
| chr2:178547907 | CTGAT                                   | C      | frameshift      | c.93715_93718del    | p.Ile31239ValfsTer8  | 1       | 0  | 0   | 0  |
| chr2:178547979 | TC                                      | T      | frameshift      | c.93646del          | p.Asp31216ThrfsTer10 | 1       | 0  | 0   | 0  |
| chr2:178548147 | C                                       | T      | stop gained     | c.93479G>A          | p.Trp31160Ter        | 1       | 0  | 0   | 0  |
| chr2:178548966 | TGTAGATC<br>A                           | T      | frameshift      | c.92652_92659del    | p.Asp30885SerfsTer3  | 1       | 0  | 0   | 0  |
| chr2:178549337 | G                                       | GCTTTT | frameshift      | c.92284_92288dup    | p.Ser30763ArgfsTer7  | 1       | 1  | 0   | 0  |
| chr2:178551807 | CTTTCT                                  | C      | frameshift      | c.91088_91092del    | p.Lys30363ArgfsTer4  | 1       | 0  | 0   | 0  |
| chr2:178552221 | T                                       | A      | stop gained     | c.90679A>T          | p.Lys30227Ter        | 0       | 1  | 1   | 1  |
| chr2:178552236 | G                                       | GAA    | frameshift      | c.90663_90664insTT  | p.Leu30222PhefsTer69 | 1       | 0  | 0   | 0  |
| chr2:178552237 | GGT                                     | G      | frameshift      | c.90661_90662del    | p.Thr30221ProfsTer14 | 1       | 0  | 0   | 0  |
| chr2:178557324 | TA                                      | T      | frameshift      | c.87937del          | p.Tyr29313MetfsTer88 | 1       | 0  | 0   | 0  |

| Locus          | Ref      | Alt | Consequence     | hgvs              | hgvs                 | Control | AF | CMP | HF |
|----------------|----------|-----|-----------------|-------------------|----------------------|---------|----|-----|----|
| chr2:178557545 | TC       | T   | frameshift      | c.87716del        | p.Gly29239AspfsTer32 | 1       | 0  | 0   | 0  |
| chr2:178559309 | A        | T   | splice donor    | c.86821+2T>A      |                      | 1       | 0  | 0   | 0  |
| chr2:178559385 | TAATA    | T   | frameshift      | c.86743_86746del  | p.Tyr28915ThrfsTer22 | 1       | 0  | 0   | 0  |
| chr2:178560364 | G        | A   | stop gained     | c.85768C>T        | p.Arg28590Ter        | 1       | 0  | 0   | 0  |
| chr2:178560865 | G        | A   | stop gained     | c.85267C>T        | p.Arg28423Ter        | 2       | 0  | 0   | 0  |
| chr2:178561762 | CACTT    | C   | frameshift      | c.84366_84369del  | p.Glu28124IlefsTer49 | 1       | 0  | 1   | 1  |
| chr2:178562528 | TC       | T   | frameshift      | c.83603del        | p.Gly27868GlufsTer3  | 1       | 0  | 0   | 0  |
| chr2:178562697 | GC       | G   | frameshift      | c.83434del        | p.Ala27812ProfsTer59 | 1       | 0  | 0   | 0  |
| chr2:178565497 | G        | A   | stop gained     | c.80635C>T        | p.Gln26879Ter        | 1       | 0  | 0   | 0  |
| chr2:178565651 | C        | T   | stop gained     | c.80481G>A        | p.Trp26827Ter        | 0       | 1  | 0   | 0  |
| chr2:178566149 | GT       | G   | frameshift      | c.79982del        | p.Tyr26661SerfsTer16 | 1       | 0  | 0   | 0  |
| chr2:178566162 | T        | TA  | frameshift      | c.79969_79970insT | p.Asp26657ValfsTer8  | 1       | 0  | 0   | 0  |
| chr2:178566237 | TC       | T   | frameshift      | c.79894del        | p.Glu26632AsnfsTer12 | 1       | 0  | 0   | 0  |
| chr2:178566634 | TG       | T   | frameshift      | c.79497del        | p.Thr26500LeufsTer24 | 1       | 0  | 0   | 0  |
| chr2:178566838 | G        | A   | stop gained     | c.79294C>T        | p.Arg26432Ter        | 0       | 1  | 0   | 1  |
| chr2:178568033 | GTTTC    | G   | frameshift      | c.78095_78098del  | p.Arg26032ThrfsTer41 | 1       | 0  | 0   | 0  |
| chr2:178570804 | G        | A   | stop gained     | c.75328C>T        | p.Arg25110Ter        | 1       | 0  | 0   | 0  |
| chr2:178570882 | G        | A   | stop gained     | c.75250C>T        | p.Arg25084Ter        | 0       | 1  | 0   | 0  |
| chr2:178571261 | CT       | C   | frameshift      | c.74870del        | p.Lys24957SerfsTer2  | 1       | 0  | 0   | 0  |
| chr2:178572193 | G        | A   | stop gained     | c.73939C>T        | p.Arg24647Ter        | 1       | 0  | 0   | 0  |
| chr2:178573085 | A        | C   | stop gained     | c.73047T>G        | p.Tyr24349Ter        | 1       | 0  | 0   | 0  |
| chr2:178573323 | AT       | A   | frameshift      | c.72808del        | p.Ile24270LeufsTer11 | 1       | 0  | 0   | 0  |
| chr2:178573742 | C        | CAA | frameshift      | c.72388_72389dup  | p.Leu24130PhefsTer4  | 1       | 0  | 0   | 0  |
| chr2:178573908 | T        | TC  | frameshift      | c.72223_72224insG | p.Lys24075ArgfsTer12 | 0       | 1  | 0   | 0  |
| chr2:178575970 | G        | A   | stop gained     | c.70162C>T        | p.Arg23388Ter        | 2       | 0  | 0   | 0  |
| chr2:178576285 | C        | A   | stop gained     | c.69847G>T        | p.Gly23283Ter        | 1       | 0  | 0   | 0  |
| chr2:178579702 | G        | A   | stop gained     | c.67495C>T        | p.Arg22499Ter        | 3       | 0  | 0   | 0  |
| chr2:178579850 | T        | G   | splice acceptor | c.67349-2A>C      |                      | 3       | 0  | 0   | 0  |
| chr2:178579938 | C        | T   | splice donor    | c.67348+1G>A      |                      | 2       | 0  | 0   | 0  |
| chr2:178580481 | CAT      | C   | frameshift      | c.66896_66897del  | p.Asn22299SerfsTer15 | 1       | 0  | 0   | 0  |
| chr2:178584726 | G        | A   | stop gained     | c.64915C>T        | p.Arg21639Ter        | 1       | 0  | 0   | 0  |
| chr2:178585291 | G        | A   | stop gained     | c.64453C>T        | p.Arg21485Ter        | 1       | 0  | 0   | 0  |
| chr2:178586802 | GC       | G   | frameshift      | c.64098del        | p.Glu21366AspfsTer8  | 1       | 0  | 0   | 0  |
| chr2:178587116 | A        | G   | splice donor    | c.64093+2T>C      |                      | 1       | 0  | 0   | 0  |
| chr2:178588700 | G        | A   | stop gained     | c.63025C>T        | p.Arg21009Ter        | 1       | 0  | 0   | 0  |
| chr2:178589076 | AACAGTAC | A   | frameshift      | c.62642_62648del  | p.Cys20881PhefsTer19 | 1       | 0  | 0   | 0  |
| chr2:178589370 | GTC      | G   | frameshift      | c.62353_62354del  | p.Asp20785HisfsTer3  | 1       | 0  | 0   | 0  |
| chr2:178590170 | G        | A   | stop gained     | c.61555C>T        | p.Arg20519Ter        | 2       | 0  | 0   | 0  |
| chr2:178590260 | T        | A   | stop gained     | c.61465A>T        | p.Arg20489Ter        | 2       | 0  | 0   | 0  |
| chr2:178590974 | T        | A   | stop gained     | c.60751A>T        | p.Lys20251Ter        | 1       | 0  | 0   | 0  |
| chr2:178592916 | CAG      | C   | frameshift      | c.59201_59202del  | p.Pro19734ArgfsTer5  | 0       | 1  | 1   | 1  |
| chr2:178593172 | C        | A   | splice donor    | c.59035+1G>T      |                      | 1       | 0  | 0   | 0  |
| chr2:178593959 | AC       | A   | splice donor    | c.58432+1del      |                      | 0       | 1  | 1   | 1  |
| chr2:178598977 | A        | AT  | frameshift      | c.56732dup        | p.Asp18911GlufsTer25 | 2       | 0  | 0   | 0  |
| chr2:178599145 | C        | T   | splice donor    | c.56647+1G>A      |                      | 1       | 0  | 0   | 0  |
| chr2:178601739 | G        | A   | stop gained     | c.55351C>T        | p.Arg18451Ter        | 1       | 0  | 0   | 0  |

| Locus          | Ref | Alt    | Consequence     | hgvs             | hgvs                 | Control | AF | CMP | HF |
|----------------|-----|--------|-----------------|------------------|----------------------|---------|----|-----|----|
| chr2:178604215 | C   | CT     | frameshift      | c.54471dup       | p.Val18158SerfsTer60 | 2       | 0  | 0   | 0  |
| chr2:178605064 | TC  | T      | frameshift      | c.54112del       | p.Glu18038ArgfsTer47 | 1       | 0  | 0   | 0  |
| chr2:178605263 | G   | A      | stop gained     | c.53914C>T       | p.Arg17972Ter        | 1       | 0  | 0   | 0  |
| chr2:178607810 | TTG | T      | frameshift      | c.52975_52976del | p.Gln17659ThrfsTer6  | 1       | 0  | 0   | 0  |
| chr2:178608700 | T   | TTCAA  | stop gained     | c.52307_52310dup | p.Glu17437AspfsTer2  | 0       | 1  | 0   | 0  |
| chr2:178609289 | G   | A      | stop gained     | c.52021C>T       | p.Arg17341Ter        | 1       | 0  | 1   | 1  |
| chr2:178609756 | G   | A      | stop gained     | c.51667C>T       | p.Arg17223Ter        | 1       | 0  | 0   | 0  |
| chr2:178610090 | G   | A      | stop gained     | c.51436C>T       | p.Gln17146Ter        | 1       | 0  | 0   | 0  |
| chr2:178610180 | C   | A      | stop gained     | c.51346G>T       | p.Glu17116Ter        | 1       | 0  | 0   | 0  |
| chr2:178611446 | ACT | A      | frameshift      | c.50781_50782del | p.Arg16927SerfsTer14 | 1       | 0  | 0   | 0  |
| chr2:178611606 | GC  | G      | frameshift      | c.50622del       | p.Lys16874AsnfsTer12 | 1       | 0  | 0   | 0  |
| chr2:178613158 | TA  | T      | splice donor    | c.49648+2del     |                      | 2       | 1  | 0   | 0  |
| chr2:178613938 | C   | T      | splice acceptor | c.49346-1G>A     |                      | 2       | 0  | 0   | 0  |
| chr2:178614465 | C   | G      | splice donor    | c.49048+1G>C     |                      | 0       | 1  | 0   | 0  |
| chr2:178614871 | CCT | C      | frameshift      | c.48734_48735del | p.Glu16245GlyfsTer32 | 1       | 0  | 0   | 0  |
| chr2:178614930 | G   | GCATAC | frameshift      | c.48672_48676dup | p.Ala16226GlyfsTer6  | 0       | 1  | 0   | 0  |
| chr2:178616728 | C   | G      | splice donor    | c.48160+1G>C     |                      | 0       | 1  | 0   | 0  |
| chr2:178617839 | G   | A      | stop gained     | c.47512C>T       | p.Arg15838Ter        | 1       | 0  | 0   | 0  |
| chr2:178617857 | G   | A      | stop gained     | c.47494C>T       | p.Arg15832Ter        | 1       | 0  | 0   | 0  |
| chr2:178618468 | A   | AGTTAC | frameshift      | c.46985_46989dup | p.Leu15664ValfsTer3  | 0       | 1  | 0   | 1  |
| chr2:178620285 | G   | T      | stop gained     | c.46236C>A       | p.Cys15412Ter        | 1       | 1  | 0   | 0  |
| chr2:178621101 | C   | T      | splice donor    | c.45616+1G>A     |                      | 1       | 0  | 0   | 0  |
| chr2:178621150 | C   | CGTAA  | frameshift      | c.45564_45567dup | p.Val15190LeufsTer18 | 1       | 1  | 0   | 0  |
| chr2:178621473 | A   | C      | splice donor    | c.45349+2T>G     |                      | 1       | 0  | 0   | 0  |
| chr2:178621474 | C   | A      | splice donor    | c.45349+1G>T     |                      | 1       | 1  | 0   | 1  |
| chr2:178621709 | TG  | T      | frameshift      | c.45114del       | p.Asn15039ThrfsTer10 | 1       | 0  | 0   | 0  |
| chr2:178622669 | C   | A      | splice donor    | c.44913+1G>T     |                      | 1       | 0  | 0   | 0  |
| chr2:178622684 | G   | A      | stop gained     | c.44899C>T       | p.Arg14967Ter        | 0       | 1  | 0   | 1  |
| chr2:178624544 | A   | AT     | frameshift      | c.44735dup       | p.His14912GlnfsTer2  | 1       | 0  | 0   | 0  |
| chr2:178624625 | C   | T      | stop gained     | c.44655G>A       | p.Trp14885Ter        | 1       | 0  | 0   | 0  |
| chr2:178629360 | AG  | A      | frameshift      | c.44364del       | p.Tyr14789ThrfsTer15 | 1       | 0  | 0   | 0  |
| chr2:178630250 | G   | A      | stop gained     | c.44272C>T       | p.Arg14758Ter        | 1       | 0  | 0   | 0  |
| chr2:178632700 | T   | A      | stop gained     | c.43306A>T       | p.Lys14436Ter        | 0       | 1  | 0   | 1  |
| chr2:178633279 | CAA | C      | frameshift      | c.42992_42993del | p.Phe14331CysfsTer3  | 1       | 0  | 0   | 0  |
| chr2:178633491 | T   | A      | stop gained     | c.42868A>T       | p.Lys14290Ter        | 1       | 0  | 0   | 0  |
| chr2:178633667 | GGA | G      | frameshift      | c.42690_42691del | p.Pro14231LeufsTer8  | 1       | 0  | 0   | 0  |
| chr2:178633670 | TC  | T      | frameshift      | c.42688del       | p.Asp14230IlefsTer6  | 1       | 0  | 0   | 0  |
| chr2:178635441 | TC  | T      | frameshift      | c.41882del       | p.Gly13961GlufsTer11 | 1       | 0  | 0   | 0  |
| chr2:178636098 | G   | A      | stop gained     | c.41473C>T       | p.Arg13825Ter        | 0       | 1  | 0   | 1  |
| chr2:178642236 | C   | T      | splice donor    | c.40558+1G>A     |                      | 4       | 0  | 0   | 0  |
| chr2:178646484 | C   | T      | splice donor    | c.40297+1G>A     |                      | 2       | 0  | 0   | 0  |
| chr2:178647063 | C   | A      | splice donor    | c.40222+1G>T     |                      | 19      | 1  | 0   | 0  |
| chr2:178647064 | C   | A      | stop gained     | c.40222G>T       | p.Glu13408Ter        | 8       | 1  | 0   | 0  |
| chr2:178649269 | G   | GT     | frameshift      | c.40035dup       | p.Pro13346ThrfsTer13 | 1       | 0  | 0   | 0  |
| chr2:178649816 | C   | A      | splice donor    | c.39895+1G>T     |                      | 1       | 0  | 0   | 1  |
| chr2:178650163 | C   | G      | splice donor    | c.39817+1G>C     |                      | 1       | 0  | 0   | 0  |

| Locus          | Ref                                         | Alt              | Consequence     | hgvs                | hgvs                  | Control | AF | CMP | HF |
|----------------|---------------------------------------------|------------------|-----------------|---------------------|-----------------------|---------|----|-----|----|
| chr2:178650755 | TG                                          | T                | frameshift      | c.39704del          | p.Pro13235GlnfsTer75  | 1       | 0  | 0   | 0  |
| chr2:178652542 | C                                           | T                | splice acceptor | c.39044-1G>A        |                       | 1       | 0  | 0   | 0  |
| chr2:178652902 | C                                           | A                | stop gained     | c.38905G>T          | p.Glu12969Ter         | 1       | 0  | 0   | 0  |
| chr2:178653304 | C                                           | A                | stop gained     | c.38725G>T          | p.Glu12909Ter         | 1       | 0  | 0   | 0  |
| chr2:178653473 | CT                                          | C                | frameshift      | c.38660del          | p.Lys12887ArgfsTer60  | 24      | 1  | 0   | 0  |
| chr2:178654010 | A                                           | T                | splice donor    | c.38464+2T>A        |                       | 1       | 0  | 0   | 0  |
| chr2:178654536 | T                                           | G                | splice acceptor | c.38207-2A>C        |                       | 1       | 0  | 0   | 0  |
| chr2:178657518 | G                                           | GGCTTTTT<br>AGGA | frameshift      | c.38007_38017dup    | p.Pro12673LeufsTer278 | 1       | 0  | 0   | 0  |
| chr2:178657735 | T                                           | A                | stop gained     | c.37906A>T          | p.Lys12636Ter         | 2       | 0  | 0   | 0  |
| chr2:178658104 | T                                           | A                | stop gained     | c.37765A>T          | p.Lys12589Ter         | 2       | 0  | 0   | 0  |
| chr2:178658356 | C                                           | T                | splice acceptor | c.37628-1G>A        |                       | 2       | 0  | 0   | 0  |
| chr2:178661970 | C                                           | CT               | frameshift      | c.37178dup          | p.Pro12394AlafsTer18  | 2       | 0  | 0   | 0  |
| chr2:178662420 | T                                           | A                | splice acceptor | c.36959-2A>T        |                       | 4       | 0  | 0   | 0  |
| chr2:178663270 | A                                           | AG               | frameshift      | c.36695dup          | p.Glu12233Ter         | 1       | 0  | 0   | 0  |
| chr2:178663903 | C                                           | T                | splice acceptor | c.36365-1G>A        |                       | 5       | 0  | 0   | 0  |
| chr2:178664099 | C                                           | G                | splice acceptor | c.36281-1G>C        |                       | 1       | 0  | 0   | 0  |
| chr2:178664443 | GACAGTTA<br>AGAATGTA<br>CCTTTGAC<br>AGGTACA | G                | splice donor    | c.36267_36280+16del |                       | 27      | 1  | 0   | 1  |
| chr2:178664867 | GT                                          | G                | frameshift      | c.36102del          | p.Glu12034AspfsTer124 | 0       | 1  | 0   | 0  |
| chr2:178664879 | TGGAA                                       | T                | frameshift      | c.36087_36090del    | p.Ser12030LysfsTer127 | 1       | 0  | 0   | 0  |
| chr2:178665446 | T                                           | A                | stop gained     | c.35974A>T          | p.Lys11992Ter         | 2       | 0  | 0   | 0  |
| chr2:178665777 | G                                           | A                | stop gained     | c.35890C>T          | p.Arg11964Ter         | 6       | 0  | 0   | 0  |
| chr2:178666870 | C                                           | CT               | frameshift      | c.35828dup          | p.Glu11945ArgfsTer6   | 1       | 0  | 0   | 0  |
| chr2:178666896 | C                                           | A                | stop gained     | c.35803G>T          | p.Glu11935Ter         | 1       | 0  | 0   | 0  |
| chr2:178667239 | C                                           | A                | stop gained     | c.35794G>T          | p.Glu11932Ter         | 2       | 0  | 0   | 0  |
| chr2:178667276 | AG                                          | A                | frameshift      | c.35756del          | p.Pro11919LeufsTer51  | 2       | 0  | 0   | 0  |
| chr2:178667440 | AC                                          | A                | splice donor    | c.35713+1del        |                       | 3       | 0  | 0   | 0  |
| chr2:178667469 | TAGGAA                                      | T                | frameshift      | c.35681_35685del    | p.Ile11894LysfsTer9   | 1       | 0  | 0   | 0  |
| chr2:178667475 | TAG                                         | T                | frameshift      | c.35678_35679del    | p.Thr11893AsnfsTer3   | 1       | 0  | 0   | 0  |
| chr2:178672405 | A                                           | G                | splice donor    | c.34930+2T>C        |                       | 4       | 0  | 0   | 0  |
| chr2:178672634 | C                                           | T                | splice donor    | c.34855+1G>A        |                       | 2       | 0  | 0   | 0  |
| chr2:178675038 | C                                           | T                | splice donor    | c.34612+1G>A        |                       | 2       | 0  | 0   | 0  |
| chr2:178675722 | T                                           | A                | stop gained     | c.34486A>T          | p.Lys11496Ter         | 1       | 1  | 0   | 0  |
| chr2:178677634 | TG                                          | T                | frameshift      | c.34277del          | p.Pro11426GlnfsTer42  | 3       | 1  | 0   | 0  |
| chr2:178677873 | GAGGT                                       | G                | frameshift      | c.34035_34038del    | p.Pro11346ArgfsTer121 | 1       | 0  | 0   | 0  |
| chr2:178680253 | C                                           | T                | splice donor    | c.33418+1G>A        |                       | 0       | 1  | 1   | 1  |
| chr2:178681374 | A                                           | T                | splice donor    | c.33247+2T>A        |                       | 1       | 0  | 0   | 0  |
| chr2:178682904 | C                                           | A                | splice acceptor | c.32888-1G>T        |                       | 3       | 0  | 0   | 0  |
| chr2:178684083 | C                                           | T                | splice acceptor | c.32723-1G>A        |                       | 1       | 0  | 0   | 0  |
| chr2:178684741 | C                                           | A                | stop gained     | c.32563G>T          | p.Glu10855Ter         | 1       | 1  | 0   | 0  |
| chr2:178685252 | C                                           | T                | splice donor    | c.32470+1G>A        |                       | 1       | 0  | 0   | 0  |
| chr2:178685517 | C                                           | T                | splice donor    | c.32392+1G>A        |                       | 2       | 0  | 0   | 0  |
| chr2:178689289 | C                                           | A                | splice donor    | c.32011+1G>T        |                       | 8       | 1  | 0   | 0  |
| chr2:178689589 | TC                                          | T                | frameshift      | c.31852del          | p.Glu10618LysfsTer7   | 1       | 0  | 1   | 1  |

| Locus          | Ref      | Alt | Consequence     | hgvs              | hgvs                 | Control | AF | CMP | HF |
|----------------|----------|-----|-----------------|-------------------|----------------------|---------|----|-----|----|
| chr2:178689897 | C        | T   | splice acceptor | c.31763-1G>A      |                      | 59      | 3  | 0   | 0  |
| chr2:178692100 | CT       | C   | splice acceptor | c.31679-2del      |                      | 1       | 0  | 0   | 0  |
| chr2:178692503 | G        | GT  | frameshift      | c.31671dup        | p.Pro10558ThrfsTer5  | 2       | 0  | 0   | 0  |
| chr2:178694598 | C        | G   | splice donor    | c.31426+1G>C      |                      | 2       | 0  | 0   | 0  |
| chr2:178696007 | TTC      | T   | frameshift      | c.31063_31064del  | p.Glu10355SerfsTer10 | 1       | 0  | 0   | 0  |
| chr2:178696271 | T        | C   | splice acceptor | c.30803-2A>G      |                      | 2       | 0  | 0   | 0  |
| chr2:178698915 | C        | A   | splice acceptor | c.30683-1G>T      |                      | 4       | 0  | 0   | 0  |
| chr2:178701120 | CT       | C   | frameshift      | c.30681del        | p.Val10228LeufsTer6  | 1       | 0  | 0   | 0  |
| chr2:178702527 | GCTCT    | G   | frameshift      | c.30356_30359del  | p.Glu10119AlafsTer15 | 1       | 0  | 0   | 0  |
| chr2:178704946 | CCTCT    | C   | frameshift      | c.29621_29624del  | p.Glu9874GlyfsTer28  | 4       | 0  | 0   | 0  |
| chr2:178706561 | G        | T   | stop gained     | c.29313C>A        | p.Cys9771Ter         | 1       | 0  | 0   | 0  |
| chr2:178706925 | T        | A   | stop gained     | c.29071A>T        | p.Lys9691Ter         | 1       | 0  | 0   | 0  |
| chr2:178706933 | GC       | G   | frameshift      | c.29062del        | p.Ala9688GlnfsTer7   | 1       | 0  | 0   | 0  |
| chr2:178706955 | CT       | C   | splice acceptor | c.29042-2del      |                      | 2       | 0  | 0   | 0  |
| chr2:178714291 | C        | G   | splice donor    | c.26482+1G>C      |                      | 3       | 1  | 0   | 0  |
| chr2:178714985 | C        | T   | splice donor    | c.26200+1G>A      |                      | 1       | 0  | 0   | 0  |
| chr2:178715235 | GA       | G   | frameshift      | c.25950del        | p.Pro8651LeufsTer2   | 1       | 0  | 0   | 0  |
| chr2:178715707 | A        | T   | stop gained     | c.25707T>A        | p.Tyr8569Ter         | 1       | 0  | 0   | 0  |
| chr2:178717522 | C        | A   | splice donor    | c.25351+1G>T      |                      | 2       | 0  | 0   | 0  |
| chr2:178718149 | TTACACTG | T   | frameshift      | c.24850_24856del  | p.Gln8284LysfsTer36  | 1       | 0  | 0   | 0  |
| chr2:178719452 | C        | A   | splice acceptor | c.23939-1G>T      |                      | 1       | 0  | 0   | 0  |
| chr2:178719833 | C        | G   | splice acceptor | c.23660-1G>C      |                      | 1       | 0  | 0   | 0  |
| chr2:178721872 | CAT      | C   | frameshift      | c.22789_22790del  | p.Met7597ValfsTer15  | 1       | 0  | 0   | 0  |
| chr2:178723045 | C        | A   | splice donor    | c.21961+1G>T      |                      | 1       | 0  | 0   | 0  |
| chr2:178723218 | C        | T   | stop gained     | c.21789G>A        | p.Trp7263Ter         | 1       | 0  | 0   | 0  |
| chr2:178723464 | AG       | A   | frameshift      | c.21635del        | p.Ser7212LeufsTer15  | 1       | 0  | 0   | 0  |
| chr2:178724539 | C        | T   | splice acceptor | c.20837-1G>A      |                      | 1       | 0  | 0   | 0  |
| chr2:178727258 | G        | A   | stop gained     | c.20107C>T        | p.Arg6703Ter         | 1       | 0  | 0   | 0  |
| chr2:178727309 | G        | A   | stop gained     | c.20056C>T        | p.Arg6686Ter         | 1       | 0  | 0   | 0  |
| chr2:178727679 | GAGATT   | G   | frameshift      | c.19894_19898del  | p.Asn6632LeufsTer7   | 1       | 0  | 0   | 0  |
| chr2:178728221 | ATC      | A   | frameshift      | c.19601_19602del  | p.Arg6534IlefsTer7   | 1       | 0  | 0   | 0  |
| chr2:178729558 | T        | TG  | frameshift      | c.18597dup        | p.Thr6200HisfsTer15  | 1       | 0  | 0   | 0  |
| chr2:178729712 | G        | A   | stop gained     | c.18541C>T        | p.Arg6181Ter         | 1       | 0  | 0   | 0  |
| chr2:178730664 | G        | A   | stop gained     | c.17869C>T        | p.Gln5957Ter         | 1       | 0  | 0   | 0  |
| chr2:178730761 | C        | CT  | frameshift      | c.17771dup        | p.Leu5925AlafsTer8   | 1       | 0  | 0   | 0  |
| chr2:178731843 | G        | A   | stop gained     | c.17032C>T        | p.Arg5678Ter         | 2       | 0  | 0   | 0  |
| chr2:178732927 | T        | TA  | frameshift      | c.16248_16249insT | p.Ile5417TyrfTer7    | 1       | 0  | 0   | 0  |
| chr2:178733098 | TA       | T   | frameshift      | c.16077del        | p.Phe5359LeufsTer28  | 3       | 0  | 0   | 0  |
| chr2:178733371 | G        | A   | stop gained     | c.15922C>T        | p.Arg5308Ter         | 2       | 0  | 0   | 0  |
| chr2:178733497 | G        | A   | stop gained     | c.15796C>T        | p.Arg5266Ter         | 1       | 0  | 0   | 0  |
| chr2:178733518 | C        | A   | splice acceptor | c.15776-1G>T      |                      | 1       | 1  | 0   | 1  |
| chr2:178734478 | G        | A   | stop gained     | c.15346C>T        | p.Arg5116Ter         | 2       | 0  | 0   | 0  |
| chr2:178734500 | C        | T   | stop gained     | c.15324G>A        | p.Trp5108Ter         | 3       | 0  | 0   | 0  |
| chr2:178734535 | CA       | C   | frameshift      | c.15288del        | p.Cys5096TrpfsTer76  | 1       | 0  | 0   | 0  |
| chr2:178734839 | G        | A   | stop gained     | c.15085C>T        | p.Arg5029Ter         | 1       | 0  | 0   | 0  |
| chr2:178735826 | CAAACCTG | C   | frameshift      | c.14613_14619del  | p.Asn4871LysfsTer10  | 1       | 0  | 0   | 0  |



| Locus          | Ref                | Alt                                                | Consequence  | hgvs                                                      | hgvs                    | Control | AF | CMP | HF |
|----------------|--------------------|----------------------------------------------------|--------------|-----------------------------------------------------------|-------------------------|---------|----|-----|----|
| chr2:178740151 | CT                 | C                                                  | frameshift   | c.13081del                                                | p.Arg4361GluTer6        | 1       | 0  | 0   | 0  |
| chr2:178740754 | G                  | GT                                                 | frameshift   | c.12478dup                                                | p.Thr4160AsnTer11       | 1       | 0  | 0   | 0  |
| chr2:178740827 | CA                 | C                                                  | frameshift   | c.12405del                                                | p.Asn4135LysTer33       | 1       | 0  | 0   | 0  |
| chr2:178741104 | CTT                | C                                                  | frameshift   | c.12127_12128del                                          | p.Lys4043ValTer7        | 1       | 0  | 0   | 0  |
| chr2:178741304 | G                  | A                                                  | stop gained  | c.11929C>T                                                | p.Gln3977Ter            | 1       | 0  | 0   | 0  |
| chr2:178741575 | AT                 | A                                                  | frameshift   | c.11657del                                                | p.Asp3886ValTer22       | 1       | 0  | 0   | 0  |
| chr2:178741797 | AT                 | A                                                  | frameshift   | c.11435del                                                | p.Asp3812ValTer20       | 0       | 1  | 0   | 0  |
| chr2:178745884 | C                  | A                                                  | stop gained  | c.16516G>T                                                | p.Glu5506Ter            | 6       | 0  | 0   | 0  |
| chr2:178745884 | C                  | CA                                                 | frameshift   | c.16515dup                                                | p.Glu5506Ter            | 1       | 0  | 0   | 0  |
| chr2:178745946 | A                  | ACTTTG                                             | frameshift   | c.16449_16453dup                                          | p.Val5485AlaTer3        | 1       | 0  | 0   | 0  |
| chr2:178746042 | C                  | CA                                                 | frameshift   | c.16357dup                                                | p.Cys5453LeuTer22       | 0       | 1  | 0   | 0  |
| chr2:178746047 | G                  | C                                                  | stop gained  | c.16353C>G                                                | p.Tyr5451Ter            | 5       | 1  | 0   | 0  |
| chr2:178746295 | GTTCT              | G                                                  | frameshift   | c.16101_16104del                                          | p.Lys5367AsnTer2        | 1       | 0  | 0   | 0  |
| chr2:178746347 | TG                 | T                                                  | frameshift   | c.16052del                                                | p.Pro5351HisTer5        | 2       | 0  | 0   | 0  |
| chr2:178746457 | CA                 | C                                                  | frameshift   | c.15942del                                                | p.Glu5315AsnTer2        | 1       | 0  | 0   | 0  |
| chr2:178746748 | G                  | A                                                  | stop gained  | c.15652C>T                                                | p.Arg5218Ter            | 1       | 0  | 0   | 0  |
| chr2:178747087 | G                  | A                                                  | stop gained  | c.15313C>T                                                | p.Arg5105Ter            | 1       | 0  | 0   | 0  |
| chr2:178747087 | G                  | GCTCTAGA<br>GTCTCTCC<br>TGGGGGT<br>GTGGAGT<br>ATCA | stop gained  | c.15312_15313insTGAT<br>ACTCCACACCCCCAG<br>GAGAGACTCTAGAG | p.Glu5104_Arg5105insTer | 2       | 0  | 0   | 0  |
| chr2:178747094 | AG                 | A                                                  | frameshift   | c.15305del                                                | p.Thr5102IleTer2        | 1       | 0  | 0   | 0  |
| chr2:178747120 | T                  | A                                                  | stop gained  | c.15280A>T                                                | p.Arg5094Ter            | 2       | 0  | 0   | 0  |
| chr2:178747139 | G                  | GT                                                 | frameshift   | c.15260_15261insA                                         | p.Gly5089ArgTer43       | 1       | 0  | 0   | 0  |
| chr2:178747224 | AG                 | A                                                  | frameshift   | c.15175del                                                | p.Leu5059Ter            | 1       | 0  | 0   | 0  |
| chr2:178747558 | CA                 | C                                                  | frameshift   | c.14841del                                                | p.Val4948CysTer12       | 1       | 0  | 0   | 0  |
| chr2:178747680 | TG                 | T                                                  | frameshift   | c.14719del                                                | p.Gln4907AsnTer37       | 1       | 0  | 0   | 0  |
| chr2:178747860 | AT                 | A                                                  | frameshift   | c.14539del                                                | p.Ile4847Ter            | 5       | 0  | 0   | 0  |
| chr2:178748025 | G                  | GCCAA                                              | frameshift   | c.14371_14374dup                                          | p.Ala4792ValTer25       | 1       | 0  | 0   | 0  |
| chr2:178748109 | G                  | C                                                  | stop gained  | c.14291C>G                                                | p.Ser4764Ter            | 1       | 0  | 0   | 0  |
| chr2:178756292 | T                  | TC                                                 | frameshift   | c.11183dup                                                | p.Leu3729ThrTer9        | 54      | 0  | 0   | 3  |
| chr2:178756681 | T                  | TA                                                 | frameshift   | c.10794dup                                                | p.Lys3599Ter            | 1       | 0  | 0   | 0  |
| chr2:178757630 | G                  | T                                                  | stop gained  | c.10590C>A                                                | p.Tyr3530Ter            | 2       | 0  | 0   | 0  |
| chr2:178757721 | T                  | TGAAACCA<br>TTGGATT<br>CTGGCTT<br>GGGAATG<br>CCA   | frameshift   | c.10467_10498dup                                          | p.His3500LeuTer16       | 2       | 0  | 0   | 0  |
| chr2:178758982 | A                  | G                                                  | splice donor | c.10303+2T>C                                              |                         | 6       | 2  | 0   | 0  |
| chr2:178764788 | G                  | A                                                  | stop gained  | c.9727C>T                                                 | p.Gln3243Ter            | 1       | 0  | 0   | 0  |
| chr2:178767782 | G                  | A                                                  | stop gained  | c.9448C>T                                                 | p.Arg3150Ter            | 1       | 0  | 0   | 0  |
| chr2:178769746 | TG                 | T                                                  | frameshift   | c.8834del                                                 | p.Thr2945LysTer20       | 1       | 0  | 0   | 0  |
| chr2:178773207 | A                  | AT                                                 | frameshift   | c.7756dup                                                 | p.Ile2586AsnTer3        | 1       | 0  | 0   | 0  |
| chr2:178773558 | G                  | A                                                  | stop gained  | c.7498C>T                                                 | p.Gln2500Ter            | 1       | 0  | 0   | 0  |
| chr2:178774206 | C                  | T                                                  | splice donor | c.7057+1G>A                                               |                         | 1       | 0  | 0   | 0  |
| chr2:178774375 | CTTCTATA<br>TTTTCT | C                                                  | frameshift   | c.6876_6888del                                            | p.Ile2295GlyTer30       | 1       | 0  | 0   | 0  |
| chr2:178774920 | C                  | A                                                  | splice donor | c.6790+1G>T                                               |                         | 1       | 0  | 0   | 0  |

| Locus          | Ref                           | Alt                        | Consequence  | hgvc            | hgvsp               | Control | AF | CMP | HF |
|----------------|-------------------------------|----------------------------|--------------|-----------------|---------------------|---------|----|-----|----|
| chr2:178776073 | G                             | A                          | stop gained  | c.5791C>T       | p.Gln1931Ter        | 1       | 0  | 0   | 0  |
| chr2:178776378 | GTA                           | G                          | frameshift   | c.5484_5485del  | p.Thr1829ArgfsTer22 | 1       | 0  | 0   | 0  |
| chr2:178776745 | T                             | A                          | stop gained  | c.5119A>T       | p.Lys1707Ter        | 1       | 0  | 0   | 0  |
| chr2:178777004 | AG                            | A                          | frameshift   | c.4859del       | p.Thr1620MetfsTer26 | 2       | 0  | 0   | 0  |
| chr2:178777148 | C                             | A                          | splice donor | c.4814+1G>T     |                     | 1       | 0  | 0   | 0  |
| chr2:178777234 | CTTTCA                        | C                          | frameshift   | c.4724_4728del  | p.Met1575SerfsTer6  | 5       | 0  | 0   | 0  |
| chr2:178779019 | GA                            | G                          | frameshift   | c.4062del       | p.Leu1355PhefsTer42 | 1       | 0  | 0   | 0  |
| chr2:178782240 | A                             | AT                         | frameshift   | c.3351dup       | p.Ser1118IlefsTer21 | 1       | 0  | 0   | 0  |
| chr2:178782872 | G                             | A                          | stop gained  | c.3034C>T       | p.Arg1012Ter        | 1       | 0  | 0   | 0  |
| chr2:178784175 | G                             | C                          | stop gained  | c.2670C>G       | p.Tyr890Ter         | 1       | 0  | 0   | 0  |
| chr2:178786030 | G                             | A                          | stop gained  | c.2188C>T       | p.Gln730Ter         | 1       | 0  | 0   | 0  |
| chr2:178786129 | T                             | A                          | stop gained  | c.2089A>T       | p.Lys697Ter         | 0       | 1  | 0   | 0  |
| chr2:178789977 | CCTTCTCC<br>TGAGTTAT<br>TTGCA | C                          | frameshift   | c.1919_1938del  | p.Val640AspfsTer19  | 2       | 0  | 0   | 0  |
| chr2:178794436 | G                             | GA                         | frameshift   | c.1360_1361insT | p.Thr454IlefsTer25  | 2       | 0  | 0   | 0  |
| chr2:178794437 | T                             | TG                         | frameshift   | c.1359_1360insC | p.Thr454HisfsTer25  | 2       | 0  | 0   | 0  |
| chr2:178800574 | A                             | ACCACAG<br>GTGTAGG<br>GATT | frameshift   | c.387_403dup    | p.Val135GlufsTer7   | 0       | 1  | 0   | 0  |
| chr2:178800653 | G                             | A                          | stop gained  | c.325C>T        | p.Arg109Ter         | 0       | 1  | 0   | 0  |

**Abbreviations:** Ref: reference allele, Alt: alternative allele, hgvc: allelic changes in coding region, hgvsp: allelic changes in protein level, AF: atrial fibrillation, CMP: nonischemic cardiomyopathy, HF: heart failure.

**Online Table X. *TTN* LOF association results with atrial fibrillation**

| Location of <i>TTN</i> LOF variants | Sample size, N | LOF carriers, N | <i>TTN</i> LOF carriers in AF cases, N /Total N (%) | <i>TTN</i> LOF carriers in controls, N /Total N (%) | OR [95%CI]       | P-value  |
|-------------------------------------|----------------|-----------------|-----------------------------------------------------|-----------------------------------------------------|------------------|----------|
| Canonical transcript                | 43139          | 554             | 49/1546 (3.17)                                      | 505/41593 (1.21)                                    | 2.71 [1.97-3.66] | 2.50E-08 |
| All transcripts                     | 43139          | 591             | 51/1546 (3.30)                                      | 540/41593 (1.30)                                    | 2.66 [1.94-3.56] | 2.80E-08 |
| Cardiac exons (PSI≥90%)             | 43139          | 198             | 34/1546 (2.2)                                       | 164/41593 (0.4)                                     | 6.15 [4.07-9.06] | 3.26E-14 |
| Non-cardiac exons (PSI<90%)         | 43139          | 395             | 17/1546 (1.1)                                       | 378/41593 (0.91)                                    | 1.26 [0.74-2.00] | 5.79E-01 |

Note, OR and 95% CI were estimated from Firth's logistic regression. OR: Odds ratio, CI: Confidence interval, PSI: percentage splicing index

**Online Table XI. Sensitivity analyses for *TTN* LOF association with AF**

| Sensitivity analyses                             | All LOF variants in <i>TTN</i> (all transcripts) |                                                     |                                                     |                  |          | LOF variants in <i>TTN</i> (cardiac exons) |                                                     |                                                     |                  |          |
|--------------------------------------------------|--------------------------------------------------|-----------------------------------------------------|-----------------------------------------------------|------------------|----------|--------------------------------------------|-----------------------------------------------------|-----------------------------------------------------|------------------|----------|
|                                                  | Sample size, N                                   | <i>TTN</i> LOF carriers in AF cases, N /Total N (%) | <i>TTN</i> LOF carriers in controls, N /Total N (%) | OR [95%CI]       | P-value  | Sample size, N                             | <i>TTN</i> LOF carriers in AF cases, N /Total N (%) | <i>TTN</i> LOF carriers in controls, N /Total N (%) | OR [95%CI]       | P-value  |
| <b>Original result</b>                           | 43139                                            | 51/1546 (3.3)                                       | 540/41593 (1.3)                                     | 2.66 [1.94-3.56] | 2.80E-08 | 43139                                      | 34/1546 (2.2)                                       | 164/41593 (0.4)                                     | 6.15 [4.07-9.06] | 3.26E-14 |
| <b>Adjusting for PRS</b>                         | 43139                                            | 51/1546 (3.3)                                       | 540/41593 (1.3)                                     | 2.66 [1.94-3.58] | 3.89E-08 | 43139                                      | 34/1546 (2.2)                                       | 164/41593 (0.4)                                     | 6.65 [4.38-9.84] | 9.19E-15 |
| <b>Remove HF prior to AF</b>                     | 43007                                            | 43/1414 (3.0)                                       | 540/41593 (1.3)                                     | 2.44 [1.74-3.35] | 1.70E-06 | 43007                                      | 27/1414 (1.9)                                       | 164/41593 (0.4)                                     | 5.35 [3.39-8.13] | 1.12E-10 |
| <b>Remove HF prior to AF + Adjusting for PRS</b> | 43007                                            | 43/1414 (3.0)                                       | 540/41593 (1.3)                                     | 2.41 [1.71-3.32] | 2.82E-06 | 43007                                      | 27/1414 (1.9)                                       | 164/41593 (0.4)                                     | 5.65 [3.57-8.65] | 6.45E-11 |

**Abbreviations:** LOF: high confidence loss of function variants, AF: atrial fibrillation, OR: odds ratio, CI: confidence interval, PRS: polygenic risk score, HF: heart failure

**Online Table XII. Association between RR interval and variants in *TTN***

|                    | All LOF variants in <i>TTN</i> (all transcripts) |                      |          | LOF variants in <i>TTN</i> (cardiac exons) |                      |          |
|--------------------|--------------------------------------------------|----------------------|----------|--------------------------------------------|----------------------|----------|
| Trait              | <i>TTN</i> LOF carriers, N /Total N (%)          | Effect size [95% CI] | P-value  | <i>TTN</i> LOF carriers, N /Total N (%)    | Effect size [95% CI] | P-value  |
| <b>RR interval</b> | 171/11522(0)                                     | -0.22 [-0.37,-0.07]  | 4.06E-03 | 53/11522(0)                                | -0.52 [-0.79, -0.25] | 1.40E-04 |

**Abbreviations:** LOF: high confidence loss of function variants, AF: atrial fibrillation, CI: confidence interval

**Online Table XIII. Variability explained by models**

| Models                                                           | R <sup>2</sup> | Improvement |
|------------------------------------------------------------------|----------------|-------------|
| <b>Null model</b>                                                | 0.211          | -           |
| <b>Null model + <i>TTN</i><sub>LOF</sub></b>                     | 0.213          | 0.002       |
| <b>Null model + <i>TTN</i><sub>LOF</sub> + 13 AF genes</b>       | 0.215          | 0.004       |
| <b>Null Model + PRS</b>                                          | 0.258          | 0.047       |
| <b>Null model + <i>TTN</i><sub>LOF</sub> + 13 AF genes + PRS</b> | 0.261          | 0.051       |

Note, Null model: covariates only model including age, sex, PCs 1-4, *TTN*<sub>LOF</sub>: LOF variants in *TTN* exons highly expressed in cardiac tissue, 13 AF genes: *SYNE2*, *RYR2*, *SCN10A*, *KCNE5*, *ZFH3*, *HCN4*, *JPH2*, *KCNE2*, *KCNQ1*, *NUP155*, *KCNA5*, *SCN5A*, *KCNN3* (with cumulative minor allele count  $\geq 10$ ), PRS: polygenic risk score

**Online Table XIV. Results from LOF burden analysis for aggregation of LOFs in functional categories**

| Gene set                      | Sample size, N | LOF carriers, N | LOF carriers in AF cases, N/Total N (%) | LOF carriers in controls, N/Total N (%) | OR   | 95% CI      | P-value  |
|-------------------------------|----------------|-----------------|-----------------------------------------|-----------------------------------------|------|-------------|----------|
| <b>Potassium Channels</b>     | 41212          | 251             | 4/1354(0.3)                             | 247/39858(0.6)                          | 0.52 | [0.17-1.19] | 1.32E-01 |
| <b>Potassium Channels IKs</b> | 41212          | 82              | 0/1354(0)                               | 82/39858(0.2)                           | 0.18 | [0-1.27]    | 1.02E-01 |
| <b>Sodium Channels</b>        | 41212          | 122             | 5/1354(0.4)                             | 117/39858(0.3)                          | 1.66 | [0.61-3.62] | 2.85E-01 |
| <b>Calcium Handling</b>       | 41212          | 806             | 16/1354(1.2)                            | 790/39858(2)                            | 0.61 | [0.36-0.97] | 3.39E-02 |
| <b>Transcription Factors</b>  | 41212          | 33              | 2/1354(0.1)                             | 31/39858(0.1)                           | 2.26 | [0.45-7.07] | 2.75E-01 |
| <b>Gap Junctions</b>          | 41212          | 9               | 1/1354(0.1)                             | 8/39858(0)                              | 3.91 | [0.4-19.17] | 1.99E-01 |

Note, LOF variants in different candidate AF genes are aggregated into functional categories<sup>31</sup> and used for association tests; P-values, ORs and CIs are from firth's logistic regression performed in unrelated participants after excluding AF cases with heart failure prior to AF. LOF: loss-of-function variants, AF: atrial fibrillation, OR: odds ratio, CI: confidence interval, IKs: slowly activating potassium current.

Potassium Channels include *ABCC9, HCN4, KCNA5, KCND3, KCNE1, KCNE2, KCNE3, KCNE4, KCNE5, KCNH2, KCNJ2, KCNJ5, KCNJ8, KCNN3, KCNQ1*; Potassium Channels IKs include *KCND3, KCNE1, KCNE2, KCNE3, KCNE4, KCNE5, KCNQ1*; Sodium Channels include *SCN1B, SCN2B, SCN3B, SCN4B, SCN5A, SCN10A*; Calcium Handling include *JPH2, RYR2*; Transcription Factors include *GATA4, GATA5, GATA6, NKX2-5, NKX2-6, PITX2, ZFHX3*; Gap Junctions include *GJA1, GJA5*

Supplemental Online Figure I

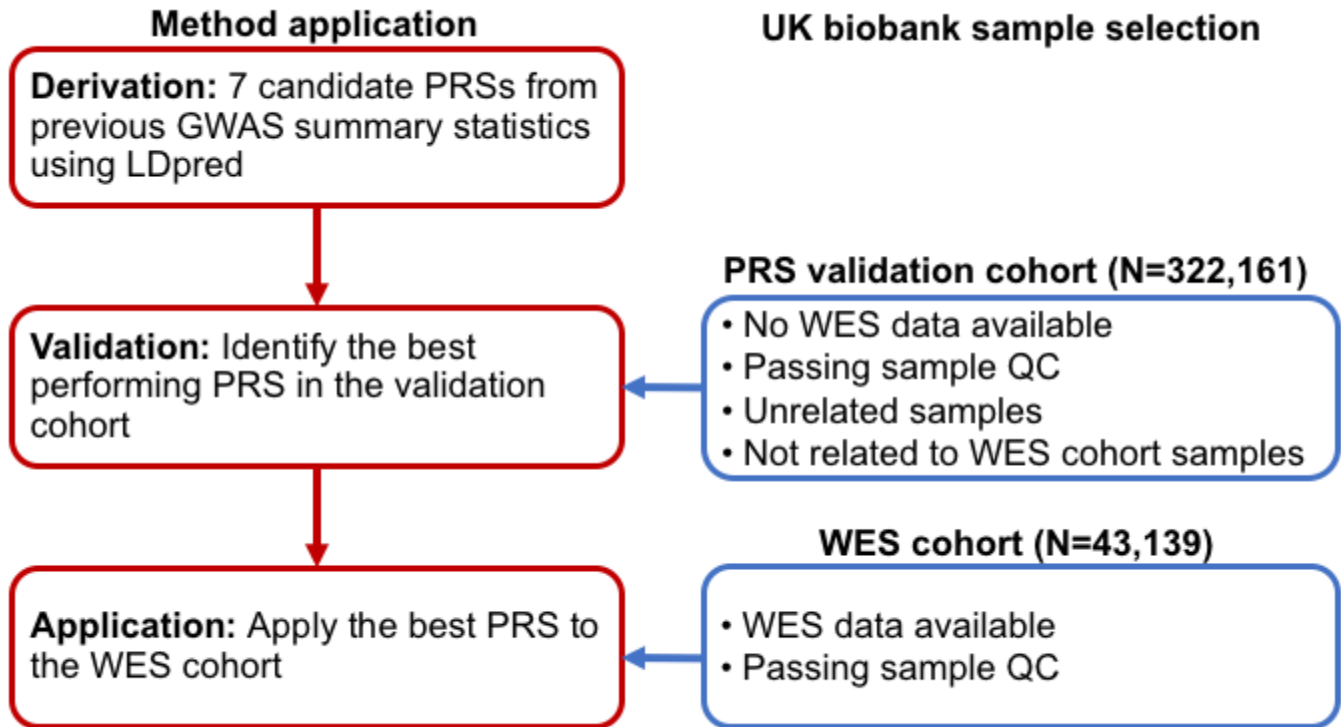

**Online Figure I. Flowchart for AF polygenic risk score validation and application in UK Biobank.** Based on previous summary GWAS statistics<sup>32</sup>, polygenic risk score (PRS) for atrial fibrillation (AF) was estimated using LDpred<sup>9</sup>. The estimated PRSs were validated in the validation cohort that did not include whole-exome sequenced participants in UK Biobank and tested in whole-exome sequencing (WES) cohort.



## Supplemental Online Figure II

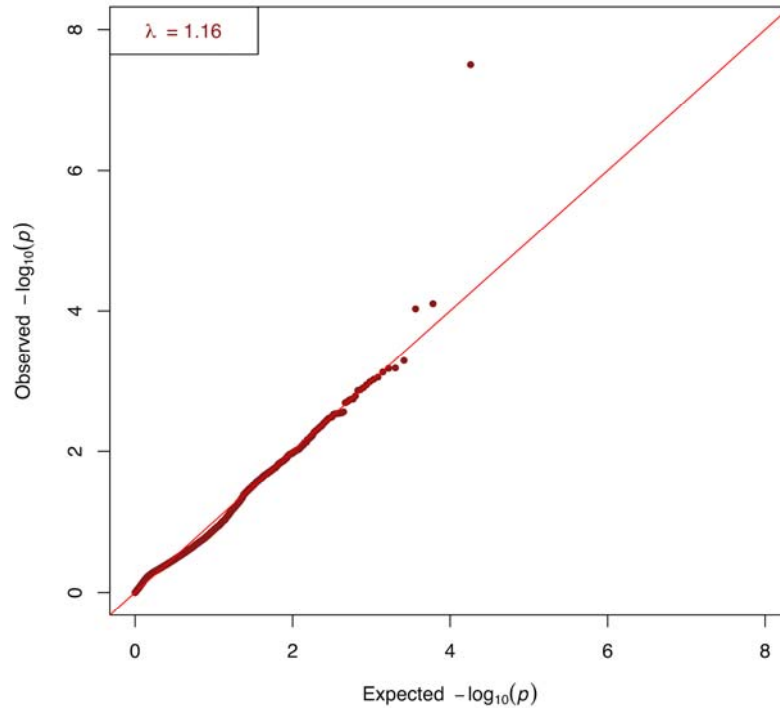

### Online Figure II. Quantile-quantile plot for gene-based burden analysis for loss-of-function variants.

The x-axis represents the expected significance for genes assuming no association, while the y-axis represents the observed significance in the analysis. The red line shows where the expected value and observed value for genes would fall assuming no association. In the present analysis, one gene strongly deviates from the null assumption. Although  $\lambda$  is considerably larger than 1, no significant genomic inflation is visible upon inspection, indicating limited systematic bias.

### Supplemental Online Figure III

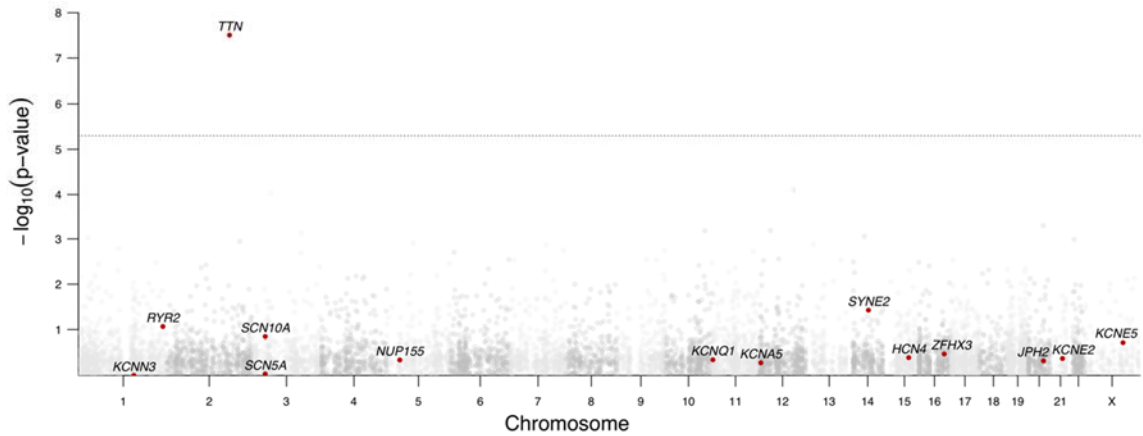

**Online Figure III. Manhattan plot of the association between previously reported monogenic genes and atrial fibrillation.** Red dots are the genes previously reported for association with atrial fibrillation. Among 37 previously reported monogenic candidate genes, 13 genes had enough carriers of loss-of-function variants to perform association tests.

## Supplemental Online Figure IV

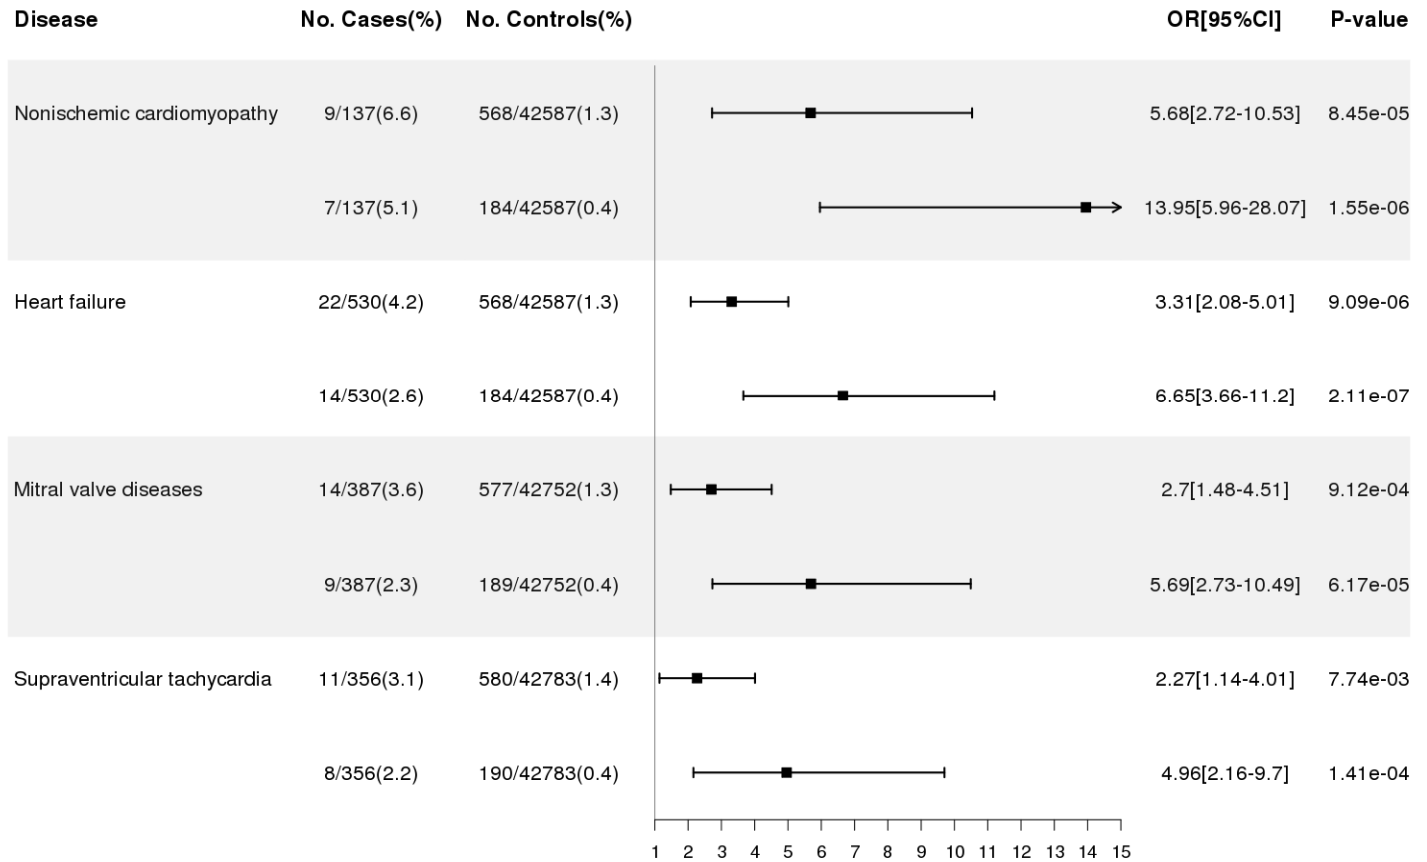

**Online Figure IV. Forest plot for associated diseases and loss-of-function (LOF) variants in *TTN*.** Online Figure IV illustrates the diseases significantly associated with LOF variants in *TTN*. The first and second rows per disease represent LOF variants in all transcripts of *TTN* and LOF variants in cardiac exons of *TTN*, respectively. Odds ratio and 95% confidence interval were estimated from Firth's logistic regression. OR: odds ratio.

## Supplemental Online Figure V

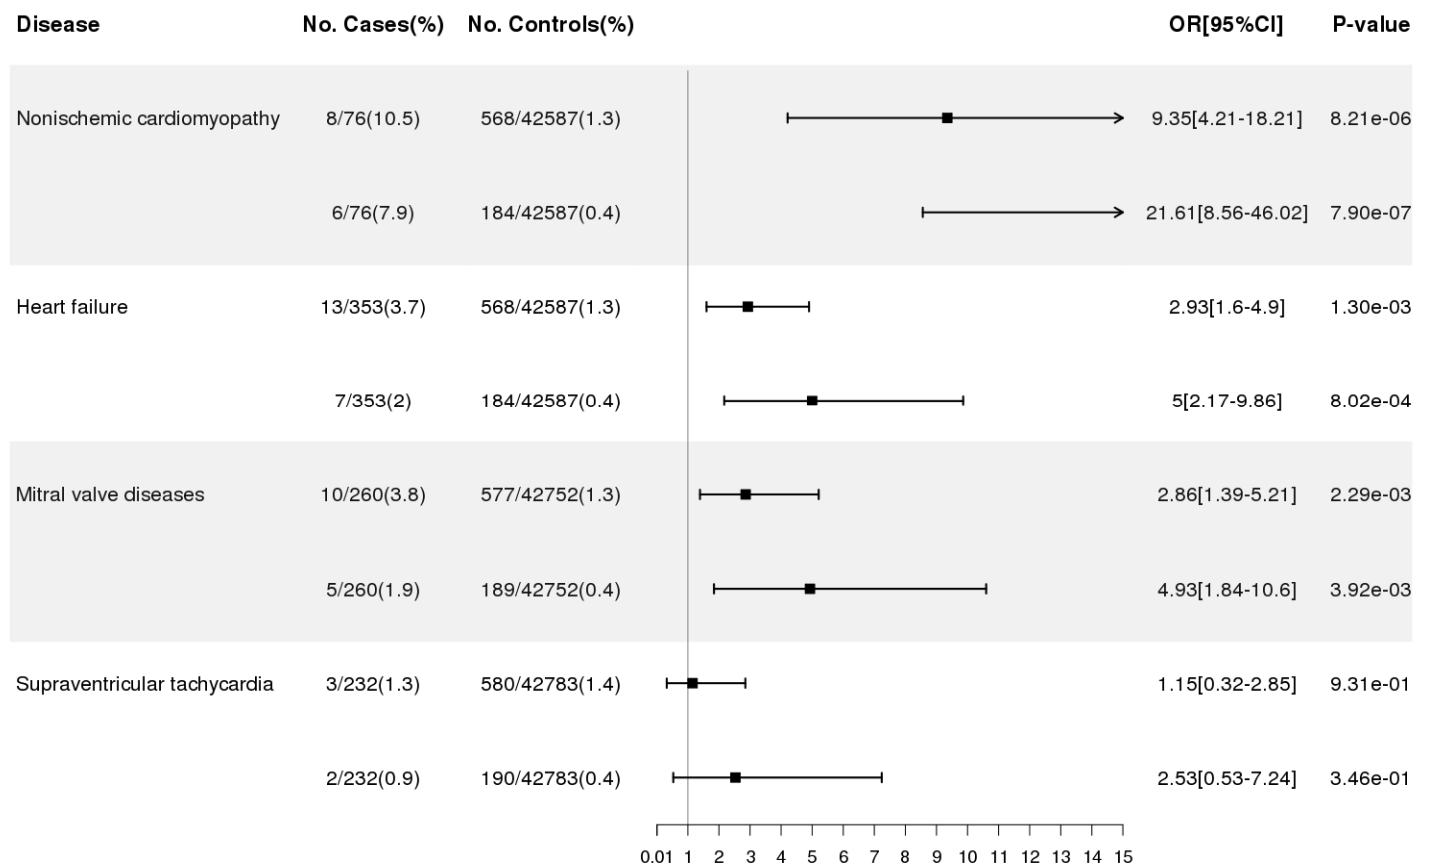

**Online Figure V. Sensitivity analyses between associated diseases and loss-of-function (LOF) variants in *TTN*.** Online Figure V exhibits an association between diseases and LOF variants in *TTN*. Participants who had atrial fibrillation prior to the diagnosis of disease were removed in this analysis. The first and second rows per disease represent LOF variants in all transcripts of *TTN* and LOF variants in cardiac exons of *TTN*, respectively. Odds ratio (OR) and 95% confidence interval (CI) were estimated from Firth's logistic regression.

Supplemental Online Figure VI

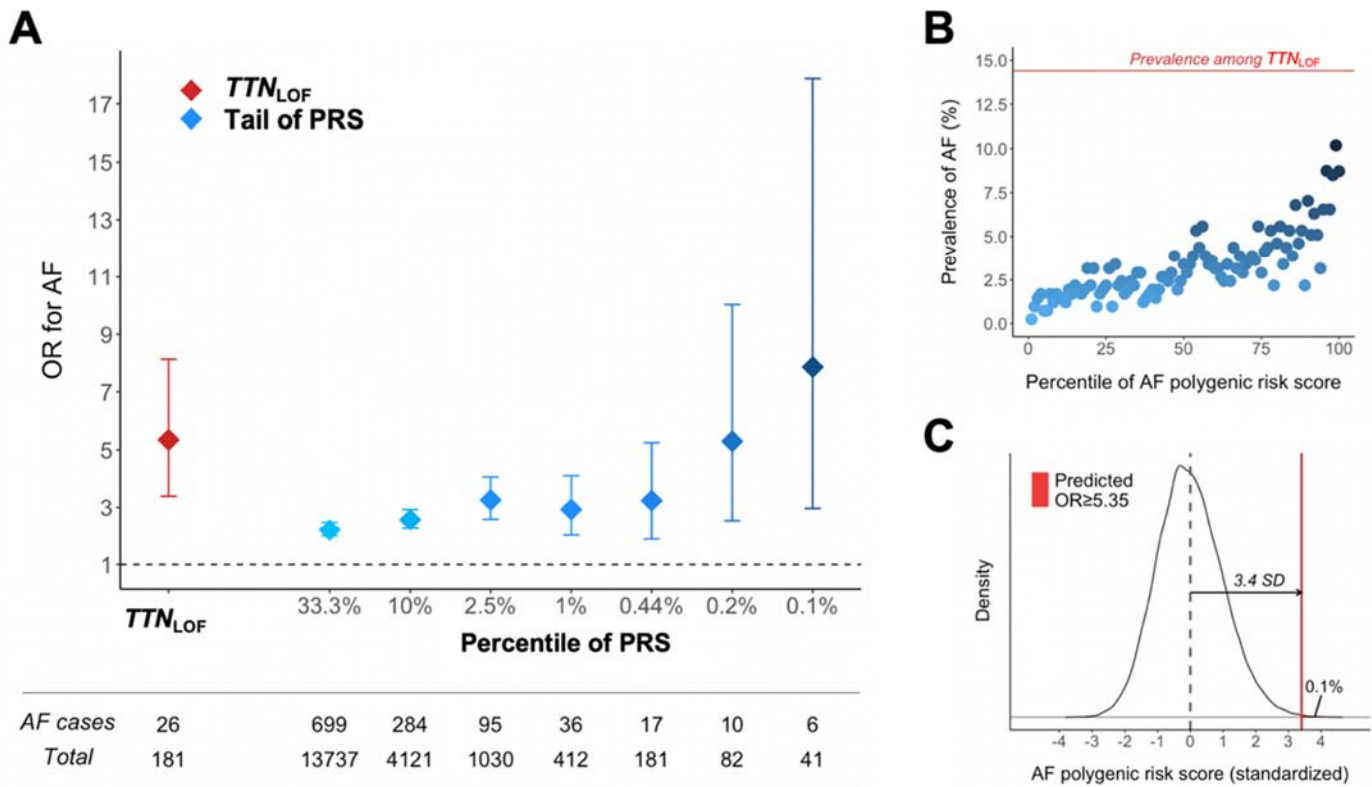

**Online Figure VI. Risk of atrial fibrillation conferred by loss-of-function variants in cardiac *TTN* compared to polygenic risk in the UK Biobank.** Online Figure VIA shows the risk of atrial fibrillation (AF) conferred by loss-of-function variants in cardiac exons of *TTN* ( $TTN_{LOF}$ ) and the risk conferred by high AF polygenic risk scores (PRS) in an unrelated subset of the exome sequencing cohort (N = 41,212). Increasingly extreme tails of the PRS distribution are compared to the remainder of the population and are shown in blue.  $TTN_{LOF}$  carriers, shown in red, are compared to noncarriers. Odds ratios (OR) are from Firth's logistic regression adjusted for sex, age and the first 4 principal components of ancestry. Individuals in the top 0.2% of PRS have a risk of AF comparable to the of  $TTN_{LOF}$  carriers. Online Figure VIB shows the prevalence of AF among percentiles of PRS in blue. The observed AF prevalence among all  $TTN_{LOF}$  carriers is indicated with the red line. Individuals in the highest percentiles of PRS do not attain an AF prevalence equivalent to that observed in  $TTN_{LOF}$  carriers. Online Figure VIC displays the distribution of the AF PRS in the population. Based on Firth's logistic regression, individuals at 3.4 standard deviations (SD) from the mean are predicted to be at equivalent AF risk to  $TTN_{LOF}$  carriers. Only 0.1% of the population is at equivalent or higher risk by PRS.

## Supplemental References

1. Regier AA, Farjoun Y, Larson DE, et al. Functional equivalence of genome sequencing analysis pipelines enables harmonized variant calling across human genetics projects. *Nat Commun*. 2018;9:4038
2. Bycroft C, Freeman C, Petkova D, et al. The uk biobank resource with deep phenotyping and genomic data. *Nature*. 2018;562:203-209
3. McCarthy S, Das S, Kretzschmar W, et al. A reference panel of 64,976 haplotypes for genotype imputation. *Nat Genet*. 2016;48:1279-1283
4. Consortium UK, Walter K, Min JL, et al. The uk10k project identifies rare variants in health and disease. *Nature*. 2015;526:82-90
5. Durbin RM, Abecasis GR, Altshuler DL, Auton A, Brooks LD, Gibbs RA, Hurles ME, McVean GA. A map of human genome variation from population-scale sequencing. *Nature*. 2010;467:1061-1073
6. Aragam KG, Chaffin M, Levinson RT, et al. Phenotypic refinement of heart failure in a national biobank facilitates genetic discovery. *Circulation*. 2018
7. Manichaikul A, Mychaleckyj JC, Rich SS, Daly K, Sale M, Chen W-M. Robust relationship inference in genome-wide association studies. *Bioinformatics*. 2010;26:2867-2873
8. Chang CC, Chow CC, Tellier LC, Vattikuti S, Purcell SM, Lee JJ. Second-generation plink: Rising to the challenge of larger and richer datasets. *Gigascience*. 2015;4:7
9. Vilhjalmsjon BJ, Yang J, Finucane HK, et al. Modeling linkage disequilibrium increases accuracy of polygenic risk scores. *Am J Hum Genet*. 2015;97:576-592
10. Pare G, Mao S, Deng WQ. A machine-learning heuristic to improve gene score prediction of polygenic traits. *Sci Rep*. 2017;7:12665
11. Khera AV, Chaffin M, Aragam KG, Haas ME, Roselli C, Choi SH, Natarajan P, Lander ES, Lubitz SA, Ellinor PT, Kathiresan S. Genome-wide polygenic scores for common diseases identify individuals with risk equivalent to monogenic mutations. *Nat Genet*. 2018;50:1219-1224
12. Tsai CT, Hsieh CS, Chang SN, Chuang EY, Juang JM, Lin LY, Lai LP, Hwang JJ, Chiang FT, Lin JL. Next-generation sequencing of nine atrial fibrillation candidate genes identified novel de novo mutations in patients with extreme trait of atrial fibrillation. *J Med Genet*. 2015;52:28-36
13. Zhabyeyev P, Hiess F, Wang R, Liu Y, Wayne Chen SR, Oudit GY. S4153r is a gain-of-function mutation in the cardiac  $ca(2+)$  release channel ryanodine receptor associated with catecholaminergic polymorphic ventricular tachycardia and paroxysmal atrial fibrillation. *Can J Cardiol*. 2013;29:993-996
14. Savio-Galimberti E, Weeke P, Muhammad R, et al. *Scn10a/nav1.8* modulation of peak and late sodium currents in patients with early onset atrial fibrillation. *Cardiovasc Res*. 2014;104:355-363
15. Jabbari J, Olesen MS, Yuan L, et al. Common and rare variants in *scn10a* modulate the risk of atrial fibrillation. *Circ Cardiovasc Genet*. 2015;8:64-73
16. Ravn LS, Hofman-Bang J, Dixen U, Larsen SO, Jensen G, Haunso S, Svendsen JH, Christiansen M. Relation of 97t polymorphism in *kcne5* to risk of atrial fibrillation. *The American journal of cardiology*. 2005;96:405-407
17. Macri V, Mahida SN, Zhang ML, Sinner MF, Dolmatova EV, Tucker NR, McLellan M, Shea MA, Milan DJ, Lunetta KL, Benjamin EJ, Ellinor PT. A novel trafficking-defective *hcn4* mutation is associated with early-onset atrial fibrillation. *Heart Rhythm*. 2014;11:1055-1062
18. Beavers DL, Wang W, Ather S, Voigt N, Garbino A, Dixit SS, Landstrom AP, Li N, Wang Q, Olivotto I, Dobrev D, Ackerman MJ, Wehrens XHT. Mutation e169k in junctophilin-2 causes atrial fibrillation due to impaired *ryr2* stabilization. *Journal of the American College of Cardiology*. 2013;62:2010-2019
19. Lai LP, Su MJ, Yeh HM, Lin JL, Chiang FT, Hwang JJ, Hsu KL, Tseng CD, Lien WP, Tseng YZ, Huang SK. Association of the human *mink* gene 38g allele with atrial fibrillation: Evidence of possible genetic control on the pathogenesis of atrial fibrillation. *Am Heart J*. 2002;144:485-490
20. Yang Y, Xia M, Jin Q, et al. Identification of a *kcne2* gain-of-function mutation in patients with familial atrial fibrillation. *Am J Hum Genet*. 2004;75:899-905
21. Nielsen JB, Bentzen BH, Olesen MS, David JP, Olesen SP, Haunso S, Svendsen JH, Schmitt N. Gain-of-function mutations in potassium channel subunit *kcne2* associated with early-onset lone atrial fibrillation. *Biomark Med*. 2014;8:557-570
22. Chen Y-H, Xu S-J, Bendahhou S, et al. *Kcnq1* gain-of-function mutation in familial atrial fibrillation. *Science (New York, N.Y.)*. 2003;299:251-254

23. Bartos DC, Duchatelet S, Burgess DE, Klug D, Denjoy I, Peat R, Lupoglazoff JM, Fressart V, Berthet M, Ackerman MJ, January CT, Guicheney P, Delisle BP. R231c mutation in *kcnq1* causes long qt syndrome type 1 and familial atrial fibrillation. *Heart Rhythm*. 2011;8:48-55
24. Das S, Makino S, Melman YF, Shea MA, Goyal SB, Rosenzweig A, Macrae CA, Ellinor PT. Mutation in the s3 segment of *kcnq1* results in familial lone atrial fibrillation. *Heart Rhythm*. 2009;6:1146-1153
25. Zhou YM, Zheng PX, Yang YQ, Ge ZM, Kang WQ. A novel *pitx2c* loss-of-function mutation underlies lone atrial fibrillation. *Int J Mol Med*. 2013;32:827-834
26. Olson TM, Alekseev AE, Liu XK, Park S, Zingman LV, Bienengraeber M, Sattiraju S, Ballew JD, Jahangir A, Terzic A. Kv1.5 channelopathy due to *kcna5* loss-of-function mutation causes human atrial fibrillation. *Hum Mol Genet*. 2006;15:2185-2191
27. Christophersen IE, Olesen MS, Liang B, Andersen MN, Larsen AP, Nielsen JB, Haunso S, Olesen SP, Tveit A, Svendsen JH, Schmitt N. Genetic variation in *kcna5*: Impact on the atrial-specific potassium current *ikur* in patients with lone atrial fibrillation. *Eur Heart J*. 2013;34:1517-1525
28. Olson TM, Michels VV, Ballew JD, Reyna SP, Karst ML, Herron KJ, Horton SC, Rodeheffer RJ, Anderson JL. Sodium channel mutations and susceptibility to heart failure and atrial fibrillation. *JAMA : the journal of the American Medical Association*. 2005;293:447-454
29. Olesen MS, Yuan L, Liang B, Holst AG, Nielsen N, Nielsen JB, Hedley PL, Christiansen M, Olesen SP, Haunso S, Schmitt N, Jespersen T, Svendsen JH. High prevalence of long qt syndrome-associated *scn5a* variants in patients with early-onset lone atrial fibrillation. *Circ Cardiovasc Genet*. 2012;5:450-459
30. Ellinor PT, Nam EG, Shea MA, Milan DJ, Ruskin JN, MacRae CA. Cardiac sodium channel mutation in atrial fibrillation. *Heart Rhythm*. 2008;5:99-105
31. Christophersen IE, Ellinor PT. Genetics of atrial fibrillation: From families to genomes. *Journal of Human Genetics*. 2015;61:1-10
32. Christophersen IE, Rienstra M, Roselli C, et al. Erratum: Large-scale analyses of common and rare variants identify 12 new loci associated with atrial fibrillation. *Nat Genet*. 2017;49:1286
